1 **Germline and somatic genetic variants in the p53 pathway interact to affect**  
2 **cancer risk, progression and drug response**

3 Ping Zhang<sup>1</sup>, Isaac Kitchen-Smith<sup>1</sup>, Lingyun Xiong<sup>1</sup>, Giovanni Stracquadanio<sup>1, 16</sup>, Katherine Brown<sup>2, 17</sup>,  
4 Philipp Richter<sup>1</sup>, Marsha Wallace<sup>1</sup>, Elisabeth Bond<sup>1</sup>, Natasha Sahgal<sup>1</sup>, Samantha Moore<sup>1</sup>, Svanhild  
5 Nornes<sup>1</sup>, Sarah De Val<sup>1</sup>, Mirvat Surakhy<sup>1</sup>, David Sims<sup>2</sup>, Xuting Wang<sup>3</sup>, Douglas A. Bell<sup>3</sup>, Jorge Zeron-  
6 Medina<sup>4</sup>, Yanyan Jiang<sup>5</sup>, Anderson Ryan<sup>5</sup>, Joanna Selfe<sup>6</sup>, Janet Shipley<sup>6</sup>, Siddhartha Kar<sup>7</sup>, Paul  
7 Pharoah<sup>7</sup>, Chey Loveday<sup>8</sup>, Rick Jansen<sup>9</sup>, Lukasz F. Grochola<sup>10</sup>, Claire Palles<sup>11</sup>, Andrew Protheroe<sup>13</sup>,  
8 Val Millar<sup>14</sup>, Daniel Ebner<sup>14</sup>, Meghana Pagadala<sup>15</sup>, Sarah P. Blagden<sup>12</sup>, Tim Maughan<sup>12</sup>, Enric  
9 Domingo<sup>12</sup>, Ian Tomlinson<sup>11</sup>, Clare Turnbull<sup>8</sup>, Hannah Carter<sup>15</sup> and Gareth Bond<sup>1</sup>

10

11 <sup>1</sup>Ludwig Institute for Cancer Research, University of Oxford, Nuffield Department of Clinical  
12 Medicine, Old Road Campus Research Building, Oxford OX3 7DQ, UK

13 <sup>2</sup>Weatherall Institute of Molecular Medicine, University of Oxford, John Radcliffe Hospital, Oxford  
14 OX3 9DS, UK

15 <sup>3</sup>Environmental Epigenomics and Disease Group, Immunity, Inflammation, and Disease Laboratory,  
16 National Institute of Environmental Health Sciences-National Institutes of Health, Research Triangle  
17 Park, NC 27709, USA

18 <sup>4</sup>Vall d'Hebron University Hospital, Oncology Department, Passeig de la Vall D'Hebron 119, 08035  
19 Barcelona, Spain

20 <sup>5</sup>CRUK & MRC Oxford Institute for Radiation Oncology, University of Oxford, Department of  
21 Oncology, Old Road Campus Research Building, Oxford OX3 7DQ, UK

22 <sup>6</sup>Sarcoma Molecular Pathology Team, Divisions of Molecular Pathology and Cancer Therapeutics, The  
23 Institute of Cancer Research, Sutton, Surrey SM2 5NG, UK.

24 <sup>7</sup>Department of Public Health and Primary Care, University of Cambridge, Cambridge CB1 8RN, UK

25 <sup>8</sup>Division of Genetics and Epidemiology, The Institute of Cancer Research, London SW3 6JB, UK

26 <sup>9</sup>Amsterdam UMC, Vrije Universiteit Amsterdam, Department of Psychiatry, Amsterdam  
27 Neuroscience, the Netherlands

28 <sup>10</sup>Institute for Surgical Pathology, University Hospital of Zurich, Switzerland

29 <sup>11</sup>Institute of Cancer and Genomic Sciences, University of Birmingham, Birmingham B15 2TT, UK

30 <sup>12</sup>Department of Oncology, University of Oxford, Oxford OX3 7DQ, UK

31 <sup>13</sup>Oxford Cancer and Haematology Centre, Oxford University Hospitals NHS Foundation Trust,  
32 Oxford OX3 7LE, United Kingdom.

33 <sup>14</sup>Target Discovery Institute, University of Oxford, Nuffield Department of Medicine, Oxford OX3  
34 7FZ, UK

35 <sup>15</sup>Department of Medicine, University of California, San Diego, La Jolla, CA 92093, USA

36 <sup>16</sup> Present address: Institute of Quantitative Biology, Biochemistry, and Biotechnology, SynthSys,  
37 School of Biological Sciences, University of Edinburgh, Edinburgh, EH9 3BF, UK

38 <sup>17</sup> Present address: Division of Virology, Department of Pathology, University of Cambridge,  
39 Cambridge, CB2 1QP, UK

40

41 **Corresponding Authors:**

42 Hannah Carter, UCSD, 9500 Gilman Drive, La Jolla, CA 92093-0688. Phone: 858-822-4706; Fax:  
43 858-822-4246; E-mail: [hkcarter@ucsd.edu](mailto:hkcarter@ucsd.edu);

44 Gareth Bond, University of Oxford, Roosevelt Drive, Oxford OX3 7DQ. Phone: 0044-(0)1865-  
45 617497; Fax: 0044-(0)1865-617515; E-mail: [gareth.bond@ludwig.ox.ac.uk](mailto:gareth.bond@ludwig.ox.ac.uk)

46 **Abstract**

47 Insights into oncogenesis derived from cancer susceptibility loci could facilitate  
48 better cancer management and treatment through precision oncology. However,  
49 therapeutic applications have thus far been limited by our current lack of  
50 understanding regarding both their interactions with somatic cancer driver mutations  
51 and their influence on tumorigenesis. Here, by integrating germline datasets relating  
52 to cancer susceptibility with tumour data capturing somatically-acquired genetic  
53 variation, we provide evidence that single nucleotide polymorphism (SNPs) and  
54 somatic mutations in the p53 tumor suppressor pathway can interact to influence  
55 cancer development, progression and treatment response. We go on to provide human  
56 genetic evidence of a tumor-promoting role for the pro-survival activities of p53,  
57 which supports the development of more effective therapy combinations through their  
58 inhibition in cancers retaining wild-type p53.

59

60 **Significance**

61 We describe significant interactions between heritable and somatic genetic variants  
62 in the p53 pathway that affect cancer susceptibility, progression and treatment  
63 response. Our results offer evidence of how cancer susceptibility SNPs can interact  
64 with cancer driver genes to affect cancer progression and identify novel therapeutic  
65 targets.

## 66 **Introduction**

67 Efforts to characterize the somatic alterations that drive oncogenesis have led to  
68 the development of targeted therapies, facilitating precision approaches that condition  
69 treatment on knowledge of the tumor genome, and improving outcomes for many  
70 cancer patients (1,2). However, such targeted therapies are associated with variable  
71 responses, eventual high failure rates and the development of drug resistance. Somatic  
72 genetic heterogeneity among tumors is a major factor contributing to differences in  
73 disease progression and therapeutic response (1). The maps of common germline  
74 genetic variants that associate with disease susceptibility allow us to generate and test  
75 biological hypotheses, characterize regulatory mechanisms by which variants  
76 contribute to disease, with the aim of integrating the results into the clinic. However,  
77 there are challenges in harnessing of susceptibility loci for target identification for  
78 cancer, including limitations in (i) exposition of causative variants within  
79 susceptibility loci, (ii) understanding of interactions of susceptibility variants with  
80 somatic driver mutations, and (iii) mechanistic insights into their influence on cellular  
81 behaviors during and after the evolution of somatic cancer genomes (3-5).

82 A key cancer signaling pathway known to harbor multiple germline and somatic  
83 variants associated with cancer susceptibility is the p53 tumor suppressor pathway  
84 (6). It is a stress response pathway that maintains genomic integrity and is among the  
85 most commonly perturbed pathways in cancer, with somatic driver mutations found in  
86 the *TP53* gene in more than 50% of cancer genomes (7). Loss of the pathway and/or  
87 the gain of pro-cancer mutations can lead to cellular transformation and tumorigenesis  
88 (8). Once cancer has developed, the p53 pathway is important in mediating cancer  
89 progression and the response to therapy, as its anti-cancer activities can be activated  
90 by many genotoxic anticancer drugs (9). These drugs are more effective in killing  
91 cancers with wild-type p53 relative to mutant p53 (10,11). While both germline and  
92 somatic alterations to the p53 pathway are known to promote tumorigenesis, the  
93 extent to which such variants cooperate to alter pathway activity and the effects on  
94 response to therapy remain poorly understood.

95 In general, p53 mutations drive cancer through loss of wild-type function,  
96 dominant negative and gain-of-function activities which have been demonstrated to  
97 confer pro-cancer activities such as metastasis, altered energy metabolism, and  
98 replicative immortality (12-14). Mutations are primarily missense mutations that

99 affect p53's ability to bind to DNA in a sequence-specific manner and regulate  
100 transcription of its target genes. Some of these same *TP53* mutations when found  
101 constitutionally result in Li-Fraumeni Syndrome: a syndrome comprising dramatic  
102 increase in cancer risk in many tissues types. Although targeting driver mutations in  
103 tumor suppressors has been challenging, the high abundance of p53 mutations in  
104 cancer has motivated the development of small molecules that aim to reactivate  
105 mutant p53 to increase sensitivities to DNA-damaging therapies or inhibit gain-of  
106 function activities (15).

107 Somatic driver mutations in other p53 pathway genes are also current drug  
108 targets. In a sub-set of p53 wild-type cancers, p53 signaling can be attenuated through  
109 somatic driver events that alter key p53 regulators. For example, the MDM2  
110 oncogene is amplified in a variety of cancers. Its amplification results in decreased  
111 p53-mediated tumor suppression, increased cancer susceptibility, and the reduction of  
112 selection pressures for somatic p53 mutations (16). Moreover, cancer cells with  
113 amplified MDM2 and wild-type p53 have an attenuated p53-mediated DNA damage  
114 response (17). Thus, amplification of MDM2 is a promising target for treatment, in  
115 combination with DNA-damaging therapies (15,18).

116 Most studies have separately examined the consequences of somatic and  
117 germline variation affecting p53 activity to understand their roles in disease risk,  
118 progression or response to therapy. Here we hypothesize that cancer-associated  
119 germline variants (single nucleotide polymorphisms, SNPs) interact with p53 somatic  
120 driver mutations to modify cancer risk, progression and potential to respond to  
121 therapy. With a focus on cancer-associated SNPs with the potential to directly  
122 influence p53 activity, we provide supportive evidence for this hypothesis, and go on  
123 to demonstrate their ability to discover candidate drug targets.

124

## 125 **Results**

### 126 **1. p53 regulatory cancer risk SNPs associate with subtype heterogeneity**

127 We first explored whether cancer susceptibility SNPs could influence the  
128 frequency of somatic mutation of *TP53* of tumors arising in carriers. It is known that  
129 key regulatory pathway genes and stress signals, which can regulate wild-type p53  
130 levels and tumor suppressive activities, can also regulate mutant p53, including its

131 oncogenic activities (19-21). Thus, we reasoned that key p53 regulatory genes could  
132 have SNPs that modify the ability of mutant p53 to drive cancer and of wild type  
133 (WT) p53 to suppress it. If true, these SNPs could associate with allelic-differences in  
134 susceptibility to both WT and mutant p53 cancers, but the direction of their  
135 associations with risk would be different (heterogeneity risk SNPs) (**Fig. 1A**).

136 To test this, we first sought to identify cancer risk SNPs that are potential  
137 modifiers of p53 activity from existing GWAS and eQTL data. Specifically, we  
138 identified cancer risk-associated SNPs determined by GWAS, which have also been  
139 found to associate with differential expression levels of p53 pathway genes in eQTL  
140 databases. There are currently 1,225 cancer GWAS lead SNPs ( $p < 5e-08$ ) in the  
141 GWAS database, which are in linkage disequilibrium (LD) with 27,367 proxies ( $r^2 >$   
142  $0.8$  in EUR). In the three largest expression quantitative trait loci (cis-eQTLs)  
143 datasets, 15,406 of these cancer risk SNPs (lead SNPs and proxies) reside in eQTLs  
144 (eSNPs) associating with allelic differences in expression levels of 1,438 genes  
145 (eGenes) in at least one tissue/cell type (22-24) (**Supplementary Table S1**). When  
146 the eGenes are attributed to well-annotated cellular pathways (KEGG pathway  
147 database, Methods), we find that p53 pathway genes are over-represented relative to  
148 all other annotated pathways in the database ( $p = 5.5 \cdot 10^{-6}$ , adjust  $p = 7.8 \cdot 10^{-5}$ ;  
149 **Supplementary Fig. 1A**), similar to the results found in a previously published study  
150 (6). The p53 pathway eGenes include the *TP53* gene itself, as well as key regulator  
151 genes (*MDM4*; *ATM*; *CHEK2*; *CDKN2A*) and key effector genes (*CASP8*; *CDKN1A*;  
152 *FAS*; *PIDD*; *CCNE1*; *CCND1*; *SESNI*; *PMAIP1*).

153 Next, we sought to identify a population of heterogeneity risk SNPs in cancers  
154 that associate with disease subtypes that differ substantially in p53 mutation  
155 frequencies and for which susceptibility GWAS data was available. 18% of estrogen  
156 receptor positive breast cancers (ER+BC) mutate p53, in contrast to 76% of estrogen  
157 receptor negative breast cancers (ER-BC) (25). Similarly, less than 10% of low-grade  
158 serous ovarian cancers (LGSOC) mutate p53, in contrast to 96% of high grade serous  
159 ovarian cancers (HGSOC) (26). Over 85% of p53 pathogenic missense mutations in  
160 breast and ovarian cancers are oncogenic (either dominant negative or gain-of-  
161 function) (**Fig. 1B**) (see Methods). We analyzed data from 90,969 breast cancer  
162 patients of European ancestry (69,501 ER-pos BC, 21,468 ER-neg BC) (27) and  
163 105,974 controls, and 14,049 ovarian cancer patients of European ancestry (1,012

164 LGSOC, 13,037 HGSOc) and 40,941 controls (28). We found that, of the 15,406  
165 cancer risk eSNPs, 1,634 showed significant subtype heterogeneity after correction  
166 for multiple hypothesis testing (Bonferonni adjusted  $P_{het} < 0.05$ ; **Supplementary**  
167 **Table S2**) across the four subtypes (ER+BC, ER-BC, LGSOC, HGSOc) (subtype  
168 heterogeneity SNPs, shSNPs). (**Fig. 1C**). For 110 out of the 1,634 shSNPs, the  
169 directions of the allelic-associations with risk were consistent with the p53 mutational  
170 frequencies of the breast and ovarian subtypes (*TP53*-relevant subtype heterogeneity  
171 SNPs, *TP53*-shSNPs; **Fig. 1C**, purple bars). That is, the alleles of these SNPs that are  
172 associated with increased cancer risk ( $OR > 1$ ) in the subtypes with low p53 mutation  
173 frequencies (ER+BC and LGSOC), are associated with decreased cancer risk ( $OR < 1$ )  
174 in the subtypes with high p53 mutation frequencies (ER-BC and HGSOc), and vice  
175 versa.

176 The 110 *TP53*-shSNPs are eSNPs for 17 eGenes and the remaining 1,524  
177 shSNPs (other-shSNPs) are eSNPs for 129 eGenes. We reasoned that if key p53  
178 regulatory genes have SNPs that modify the ability of mutant p53 to drive cancer and  
179 of wild type (WT) p53 to suppress it, p53 pathway genes could be enriched amongst  
180 the 17 eGenes defined by the *TP53*-shSNPs. Indeed, the 17 eGenes are only  
181 significantly enriched in p53 pathway genes and no other annotated pathway (KEGG:  
182 87.0-fold, adjusted  $p = 9.9e-04$ ; **Fig. 1D**, left panel). Importantly, no such enrichment  
183 of p53 pathway genes, or any other pathways, is seen in the 129 eGenes defined by  
184 the other-shSNPs (Fig. 1D, right panel). The p53 pathway eGenes include the *TP53*  
185 gene itself, as well as key p53 regulator genes (*MDM4* and *ATM*). Thus, key p53  
186 pathway genes harbor cancer-associated regulatory SNPs, which significantly  
187 associate with subtype heterogeneity in a manner that follows p53 mutational  
188 frequencies: 44 eSNPs in *ATM*, 33 eSNPs in *MDM4* and 3 eSNPs in *TP53*. All SNPs  
189 in each gene are in LD ( $r^2$  and/or  $d'$   $> 0.9$  in Europeans) (**Fig. 2A**; **Supplementary**  
190 **Table S3**).

## 191 **2. p53 regulatory cancer risk SNPs associate with somatic *TP53* mutational** 192 **status**

193 Each of these three loci have been previously found to associate with differential  
194 risk for at least one cancer in the broader population (29-32), and the above analysis  
195 provides evidence that they significantly associate with subtype heterogeneity in a  
196 manner that follows p53 mutational frequencies. This observation supports a

197 persistent effect for p53 pathway cancer risk SNPs on tumors through a possible  
198 influence on whether or not a tumour contains a somatically mutated *TP53* locus. In  
199 order to seek further and more direct support of this possibility, we performed similar  
200 analyses of these three loci in a cohort of 7,021 patients of European origin diagnosed  
201 with 31 different cancers and for whom the p53 mutational status of their cancers  
202 could be determined (The Cancer Genome Atlas, TCGA).

203 In this cohort, 35.8% of patients have at least one pathogenic p53 mutation in  
204 their cancers, 37.8% have p53 copy-number loss (CNV loss), and 20.8% have both  
205 (**Supplementary Table S4**). We partitioned the patients into two groups based on the  
206 presence or absence of the p53 somatic alteration (mutation and CNV loss versus WT  
207 and no CNV loss). We hypothesized that if an allele of a given SNP was found to  
208 associate with increased risk in cancer subtypes with lower p53 frequencies, it will be  
209 more frequent in those patients with wild type TP53 cancers/tumours, and vice versa.  
210 Thus, we performed association testing between the three loci and p53 somatic  
211 alterations using a Fisher exact test (**Fig. 2B**, one-sided). For each locus, we  
212 performed association testing using the SNP that showed the strongest associations  
213 with subtype heterogeneity and, for which, genotype information was available.  
214 Interestingly, two of these three SNPs associated with allelic differences in minor  
215 allele frequencies between the groups of patients with either p53 WT or mutant  
216 tumours (*TP53* SNP and the *MDM4* SNP; **Fig. 2C**). Importantly, the association of  
217 the *TP53* SNP, rs78378222, remains significant even after correction for multiple  
218 hypothesis testing (Bonferonni adjusted  $p = 0.035$ ; **Fig. 2C**). For this SNP, the minor  
219 C-allele is associated with increased cancer risk in ER+BC and LGSOC (less p53  
220 mutations), but decreased cancer risk in ER-BC and HGSOC (more p53 mutations)  
221 (**Fig. 2A**). This is in line with the associations found with p53 mutational status,  
222 whereby the C-allele is more frequent in TP53 WT tumors (**Fig. 2C**). Together, these  
223 observations lend further support to a persistent effect for p53 pathway cancer risk-  
224 associated SNPs on tumors through a possible influence on whether or not a tumor  
225 contains a somatically mutated TP53 locus.

### 226 **3. A p53 regulatory cancer risk SNP can affect wild type and mutant p53 in** 227 **tumors**

228 The TP53 SNP, rs78378222, resides in the 3'-UTR (p53 poly(A) SNP). The  
229 minor C-allele has been previously found to associate with lower p53 mRNA levels in



230 blood samples (33). Indeed, when we examine all cellular transcripts using genotype  
231 and gene expression data from 4,896 peripheral blood samples, the p53 poly(A) SNP  
232 only associates with allelic differences in p53 RNA levels and no other transcripts,  
233 whereby the minor C-allele associates with less p53 transcripts ( $p=2.0e-25$ ,  $\beta=-$   
234  $0.62$ ; **Fig. 3A**). To investigate the activity of this SNP in tumors, we analyzed  
235 expression data from 3,248 tumors from the TCGA cohort, for which both germline  
236 and somatic genetic data was available and no somatic copy number variation of p53  
237 could be detected. Similar to results obtained in the blood samples, we observed a  
238 significant association of the minor C-allele with lower p53 expression levels in the  
239 tumors ( $p=1.7e-04$ ,  $\beta=-0.37$ ; **Fig. 3B**). To test if the C-allele associates with lower  
240 levels of both wild type and mutant p53, we divided the tumors into three groups  
241 based on their respective somatic p53 mutational status (**Fig. 3C** and **Supplementary**  
242 **Table S4**). We found 2,521 tumors with wild type p53 genes, 448 with missense  
243 mutations, and, of those, 389 with oncogenic missense mutations. In all three groups,  
244 the C-allele significantly associates with lower p53 expression levels (**Fig. 3D**).

245 To further study the effect of the p53 poly(A) SNP on p53 expression in cancer  
246 cells, we developed a primarily isogenic cellular model with the two different alleles  
247 in the endogenous p53 locus. Specifically, we utilized Hap1 cells that contain a  
248 dominant-negative p53 missense mutation (p.S215G), which results in a mutated  
249 DNA-binding domain (34), and which has been found in many cancer types  
250 (COSM43951). Using CRISPR/Cas9-mediated genome editing and homologous  
251 recombination, we generated clones with either the A-allele or the C-allele (**Fig. 3E**  
252 and **Supplementary Fig. 1B**). Consistent with the results found in the TCGA tumors,  
253 we found significantly lower p53 mRNA levels in cells with the C-allele relative to  
254 the A-allele using qRT-PCR ( $\sim 2$  fold,  $p = 6.8e-08$  for clone #1 and  $p = 0.0038$  for  
255 clone #2; **Fig. 3F**). We also found the C-allele containing cells express less p53  
256 protein: approximately 2-fold (**Fig. 3G**). The impairment of 3'-end processing and  
257 subsequent transcription termination by the minor allele of the p53 poly(A) SNP, have  
258 been proposed as a mechanism for the genotype-dependent regulatory effects on p53  
259 expression (33). To investigate whether this is also the mechanism by which the C-  
260 allele reduces oncogenic mutant p53 levels in cancer cells, we determined the levels  
261 of p53 mRNA transcripts not cleaved at the canonical AAUAAA site (uncleaved)  
262 relative to the cleaved transcripts using two different approaches. First, using specific

263 probe/primer sets and qRT-PCR, we observed significant 6-10-fold relative  
264 enrichments of uncleaved p53 mRNA in cells carrying the C-allele compared to the  
265 A-allele (**Fig. 3H**). Next, using data derived from 3' RNA-sequencing of RNA  
266 derived from logarithmically growing cells from multiple clones of each genotype, we  
267 also found more uncleaved p53 mRNA in cells carrying the C-allele (red and orange  
268 tracks; **Fig. 3I**) relative to A-allele (grey tracks). Together, our data demonstrate that  
269 this cancer risk-associated SNP can influence the expression of both wild type and  
270 mutant p53 in cancer cells and tumors.

271 In order to explore whether allelic differences in mutant p53 expression result in  
272 allelic-differences in the oncogenic properties of mutant p53 in cancer cells, we next  
273 compared the transcriptomes of cells with the different alleles, given the increasing  
274 evidence that mutant p53 activities are critical components of oncogenic  
275 transcriptional networks (15). We found both C-allele containing clones (less mutant  
276 p53) to differentially express a similar number of transcripts relative to the parental  
277 cell line (A-allele; more mutant p53; 182 down-regulated and 118 up-regulated genes  
278 in clone #1, and 211 down-regulated and 153 up-regulated genes in clone #2; fold  
279 change > 1.5, adjusted p value < 0.05; **Fig. 3J**), and the log2 fold change of these  
280 differentially expressed genes are highly correlated (Pearson's  $r = 0.77$ ; **Fig. 3K**). To  
281 examine whether the genotype-dependent transcriptional alterations are associated  
282 with changes in mutant p53-associated oncogenic networks, we first excluded the  
283 potential clonal effects by selecting genes that are differentially expressed in both C-  
284 allele containing clones (104 down-regulated genes and 48 up-regulated genes; **Fig.**  
285 **3K; Supplementary Table S5**). Next, we performed pathway enrichment analyses  
286 using the curated Hallmark gene sets (35). We observed the down-regulated genes to  
287 be highly enriched in transcripts involved in mutant p53-associated oncogenic  
288 networks, such as JAK/STAT, TNF- $\alpha$ /NF- $\kappa$ B and KRAS pathways (**Fig. 3L**;  
289 **Supplementary Table S6**). Specifically, these include the *CD44* and *MAP3K8*  
290 transcripts, which have been shown to be positively regulated by mutant p53 (36,37).  
291 Thus, the p53 poly(A) SNP not only results in allelic-differences in mutant p53  
292 expression, but also in one of its oncogenic properties.

293 **4. A p53 regulatory cancer risk SNP associates with patient outcome in a manner**  
294 **that depends on somatic p53 mutational status**

295 *TP53* mutation in tumors has been associated with worse survival or lack of  
296 response to therapy in many cancer types (38). Indeed, when we compare patients  
297 from the TCGA pan-cancer cohort who have tumors with p53 mutations (2,513), p53  
298 CNV loss (2,655) or both (1,457) to the patients without *TP53* mutation (4,499), loss  
299 (4,200) or both (3,168), all three groups displayed shorter progression-free interval  
300 (PFI) and worse overall survival (OS) (**Fig. 4A**). To further explore whether p53  
301 regulatory cancer-risk SNPs could have persistent effects on cancer cells and tumors,  
302 we next examined whether the p53 poly(A) SNP also associates with allelic  
303 differences in clinical outcomes in this pan-cancer cohort. We stratified the cohort  
304 into two groups based on p53 somatic alterations and the p53 poly(A) SNP genotypes.  
305 We found that in patients with p53 WT tumors, those with the minor C-alleles (less  
306 p53 expression; increased cancer risk) have a significantly shorter PFI and worse OS  
307 compared to those without the minor alleles (more p53 expression; decreased cancer  
308 risk) (**Fig. 4B**,  $p = 0.0092$  for PFI; **Fig. 4C**,  $p = 0.0059$  for OS), but not in patients  
309 without stratification (**Supplementary Fig. 1C**). An inverted, but not significant  
310 trend, among the patients with somatic *TP53* mutations is noted. The lack of  
311 significance is unsurprising do to the low minor allele frequency (**Fig. 4B-C**).  
312 Similarly, significant, p53 mutational status-dependent, associations between the p53  
313 poly(A) SNP and PFI can be found when we restrict our analyses to breast cancer  
314 patients only (**Fig. 4D**; **Supplementary Fig. 1C**).

## 315 **5. p53 pathway genes with cancer risk SNPs associate with cellular** 316 **chemosensitivities to p53 activation**

317 Somatic p53 mutation or inhibition is associated with resistance to targeted and  
318 DNA damaging chemotherapies and consequently, various therapeutic efforts have  
319 been designed around restoring p53 WT activity to improve p53-mediated cell killing  
320 (39). The identification of a p53 regulatory cancer risk SNP that affects p53  
321 expression levels, activity, mutational status and tumor progression (as demonstrated  
322 for the p53 poly(A) SNP) points to other potential entry points for therapeutically  
323 manipulating p53 activities guided by these commonly inherited variants. If true, we  
324 reasoned that the p53 pathway genes that harbor cancer risk SNPs could be more  
325 likely to associate with differential p53-mediated cancer cell killing relative to other  
326 p53 pathway genes. In total, there are 1,133 GWAS implicated cancer-risk SNPs (lead  
327 SNPs and proxies) in 41 out of 410 annotated p53 pathway genes (KEGG, BioCarta

328 and PANTHER and/or direct p53 target genes (40)) (**Supplementary Table S7**). The  
329 1,133 SNPs associate with 19 different cancers with an average odds ratio (OR) of  
330 1.17, ranging from 1.03 to 3.07 and with two SNPs associating with significantly  
331 larger ORs (**Fig. 5A**): the p53 poly(A) SNP with an odds ratio of up to 2.79 for  
332 glioma and SNPs in the p53 target gene KITLG with an odds ratio of up to 3.07 for  
333 testicular germ cell tumor risk (TGCT, **Fig. 5A** red dots).

334 To identify those p53 pathway genes whose expression associates with  
335 differential p53-mediated cancer cell killing, we mined a drug sensitivity dataset with  
336 both somatic genetic and gene expression data (GDSC, Genomics of Drug Sensitivity  
337 in Cancer; 304 drugs across 988 cell lines) (41). Of the 304 drugs analyzed, 127 drugs  
338 demonstrated heightened sensitivity in cell lines with WT *TP53* compared to those  
339 with *TP53* mutations (adjusted  $p < 0.05$ ; **Fig. 5B** orange dots; **Supplementary Table**  
340 **S8**). The p53 activator, the direct MDM2 inhibitor (Nutlin3), was the clear outlier,  
341 whereby a 5.8-fold greater sensitivity was found in *TP53* wild type cells (adjusted  $p =$   
342  $2.6e-67$ ). Moreover, in *TP53* wild type cells, but not *TP53* mutant cells, we found a  
343 further increased sensitivity to Nutlin3 in those cells with heightened expression of  
344 MDM2 mRNA (**Fig. 5C-D**). In total, 61 of the 410 p53 pathway genes (14.9%)  
345 showed similar associations with transcript levels and Nutlin3 sensitivities in *TP53*  
346 wild type cells, but not mutant cells (adjusted  $p < 0.05$ ; **Fig. 5 F**; **Supplementary**  
347 **Table S9**). Interestingly, when we restrict our analysis to those 41 p53 pathway genes  
348 with cancer risk SNPs, we note a 2.2 fold enrichment relative to pathway genes  
349 without cancer risk SNPs ( $p=0.011$ , Fisher's exact test, **Figure 5E**). Specifically, 12  
350 (29% compared to 13%) showed significant associations between the mRNA  
351 expression levels and Nutlin3 sensitivities in *TP53* wild type cells, but not mutant  
352 cells (adjusted  $p < 0.05$ ; **Fig. 5 E and 5F** red squares). These observations lend  
353 support to the hypothesis that the p53 pathway genes that harbor cancer risk SNPs are  
354 more likely to associate with differential p53-mediated cancer cell killing relative to  
355 other p53 pathway genes.

356 For 7 of the cancer risk SNP containing p53 pathway genes, higher expression  
357 levels associated with heightened sensitivity towards Nutlin3 (**Fig. 5F** orange dots and  
358 red squares), while for 5 of the genes, higher expression levels associated with less  
359 sensitivity (**Fig. 5F** blue dots and red squares). For the first group, p53 is clearly the  
360 most significant transcript and for the second, KITLG. Specifically, cell lines with

361 wild type *TP53* and more p53 mRNA expression are more sensitive to Nutlin3, as  
362 could be expected with a p53 activator ( $p = 2.0e-08$ ; **Fig. 5G** left panel), while cell  
363 lines with wild type *TP53* and more *KITLG* mRNA expression are less sensitive to  
364 Nutlin3 ( $p = 8.3e-07$ ; **Fig. 5H** left panel). It is important to note that no such  
365 association between expression level of these genes and Nutlin3 sensitivities is found  
366 in cell lines with mutant p53 (**Fig. 5F** lower panel; **Fig. 5G-H** right panel). *KITLG*  
367 (Kit Ligand, also Stem Cell Factor) encodes the ligand for the c-KIT oncogene, which  
368 activates a pro-survival signaling cascade that can be inhibited by multiple receptor  
369 tyrosine kinase inhibitors (RTKs) used for treatment of multiple cancers (42). In  
370 contrast, directly pharmacologically targeting p53 itself has proven challenging  
371 during the last three decades.

## 372 **6. The p53-bound cancer risk SNPs in *KITLG* associate with patient outcome**

373 The above-described analysis of p53 pathway genes harboring cancer risk SNPs  
374 thus points to *KITLG* as a promising candidate druggable gene whose heightened  
375 expression associates with less p53-mediated cancer cell killing. The identified TGCT  
376 risk locus falls within an intron of *KITLG* and contains a polymorphic p53 response  
377 element (p53-RE) (43). Somatic amplification of the *MDM2* oncogene is inhibitory to  
378 p53, leading to pro-survival effects on p53 wild-type cancer cell; *MDM2* is  
379 recognized thus to be a targetable entity within the p53 pathway. Hence, we sought to  
380 explore whether the p53-dependent up-regulation of *KITLG* expression could lead to  
381 similar pro-survival phenotypes in TGCT. To begin to test this, we first had to fine-  
382 map the locus for both the association with TGCT risk and p53 occupancy, in order to  
383 determine if the greatest association with TCGT risk was indeed found in the genomic  
384 region occupied by p53. Using data from the 1,000 Genomes Project as a reference  
385 panel, we imputed the genotypes for two independent TGCT GWAS cohorts (44,45).  
386 The strongest TGCT GWAS signal lies in intron 1 of *KITLG*, which contains 6  
387 common genetic variants that are in high LD in Europeans ( $r^2 > 0.95$ ) (red square, **Fig.**  
388 **6A** and **Supplementary Fig. 2A**), including the 2 lead SNPs (rs3782181 and  
389 rs4474514) identified by multiple GWAS studies. Importantly, these clustered SNPs  
390 in the *KITLG* gene reside in a region occupied by p53 in 20 of the 30 p53 ChIP-seq  
391 datasets analyzed (**Supplementary Table S10**). The cluster spans a region just over 1  
392 kb (1,355 base pairs) (**Fig. 6B**), and contains 4 SNPs (rs7965365, rs3782180,  
393 rs4590952, and rs4474514), including the previously identified rs459052, which

394 reside in predicted p53-REs as determined by a position weight matrix (PWM)  
395 developed using p53-REs in target genes (43) (**Fig. 6B**, red bars; **Supplementary**  
396 **Table S11**).

397 Next, we explored whether these p53-bound germline TGCT risk-associated  
398 SNPs could also have persistent effects on tumors during the course of the disease.  
399 To begin to test this, we first evaluated potential associations with disease  
400 progression. To do this, we determined the PFI of 118 TGCT patients of European  
401 ancestry with p53 WT tumors (TCGA, **Supplementary Table S12**). We grouped the  
402 patients with higher stage tumors (IS, II, III) or lower stage (I) TGCT  
403 (**Supplementary Fig. 2B**) and found that the cancer risk SNP(s) associated  
404 significantly with PFI in patients with higher stage tumors, whereby the alleles  
405 associated with greater TCGT risk (better predicted p53 binding) associated with  
406 shorter PFI ( $p = 0.015$ ; **Fig. 6C-D**).

#### 407 **7. The p53-bound cancer risk region is a p53-regulated KITLG enhancer in** 408 **cancer cells**

409 We next tested whether this TGCT risk locus remained a p53-regulated enhancer  
410 in cancer cells. To do this, we deleted the 1-kb region from two testicular germ cell  
411 tumor-derived cell lines (TERA1 and TERA2) with WT p53 and homozygous for the  
412 p53-bound TGCT risk alleles (p53-REs<sup>+/+</sup>) (**Supplementary Fig. S3A-C**). In all  
413 clones tested (at least 2 clones for both the non-edited, the heterozygous KO and the  
414 homozygous KO cells), we found significantly higher *KITLG* RNA levels in non-  
415 edited p53-REs<sup>+/+</sup> clones, compared to either the heterozygous KOs p53-REs<sup>+/-</sup>-  
416 clones (an average of 1.6 fold for TERA1,  $p = 7.3e-05$ ; 1.3 fold for TERA2 cells,  $p =$   
417  $0.03$ ) or the homozygous KOs REs<sup>-/-</sup> clones (an average of 3.8 fold for TERA1,  $p =$   
418  $1.7e-09$ ; 4.1 fold for TERA2 cells,  $p = 1.2e-07$ ; **Fig. 6E-F**). We then treated TERA1  
419 and TERA2 p53-REs<sup>+/+</sup> cells with the p53-activating agent Nutlin3 (an MDM2  
420 inhibitor) and observed ~4-fold induction of *KITLG* over DMSO treated cells in both  
421 cell lines (**Fig. 6G**, grey bars). Treatment of the p53-REs<sup>-/-</sup> clones with Nutlin3  
422 showed no measurable induction of *KITLG* (**Fig. 6G**, red bars versus grey bars).  
423 Moreover, the transcripts from genes that lie approximately 2 Mbp on either side of  
424 *KITLG* were measured in the clones of both genotypes, but no significant differences  
425 were found between the p53-REs<sup>-/-</sup> and p53-REs<sup>+/+</sup> clones (**Supplementary Fig.**  
426 **4A**). We also tested the dependency of the p53-bound enhancer on *KITLG* expression

427 and/or induction by reinserting it into the p53-REs<sup>-/-</sup> clones (**Supplementary Fig.**  
428 S3G-H). Re-integration rescued basal expression, resulting in significantly higher  
429 *KITLG* RNA levels in the knock-in (KI) clones of both cell lines relative to the p53-  
430 REs<sup>-/-</sup> (**Fig. 6H**). The KI clones also rescued the p53-dependent induction of *KITLG*  
431 expression relative to the p53-REs<sup>-/-</sup> (**Fig. 6H**).

432 To evaluate whether the TGCT risk haplotype in *KITLG* affects this enhancer  
433 activity in TGCT, we compared the endogenous enhancer activities of the risk  
434 haplotype and non-risk haplotype in two other TGCT cell lines (Susa-CR and GH)  
435 that we engineered to be heterozygous for this locus (**Supplementary Fig. S3D-F**).  
436 We assessed *KITLG* levels in the non-risk haplotype (p53-REs<sup>-</sup>/non-risk) and the risk  
437 haplotype (p53-REs<sup>-</sup>/risk). At basal levels, we found significantly higher *KITLG*  
438 expression in non-edited p53-REs<sup>+/+</sup> clones compared to the p53-REs<sup>-</sup>/non-risk  
439 clones (**Supplementary Fig. 4B-C**). When we treated these multiple clones with  
440 Nutlin3 to activate p53, we observed significant higher *KITLG* expression in <sup>-</sup>/risk  
441 relative to <sup>-</sup>/non-risk clones (**Supplementary Fig. 4B-C**), indicating a gain of p53-  
442 mediated enhancer activity in association with the risk haplotype. Together, these data  
443 demonstrate that the p53-bound region associated with TGCT risk and progression is  
444 a p53-regulated enhancer for *KITLG* expression in TGCT cancer cells.

#### 445 **8. p53/*KITLG* pro-survival signaling can attenuate responses to p53-activating** 446 **agents.**

447 As mentioned above, somatic amplification of the MDM2 oncogene results in  
448 pro-survival phenotypes in p53 wild type cancer cells, thus making it an attractive  
449 drug target to increase p53-mediated cancer cell killing. Thus, we next explored  
450 whether the p53-dependent up-regulation of *KITLG* expression results in similar pro-  
451 survival phenotypes in TGCT cells. *KITLG* acts through the c-KIT receptor tyrosine  
452 kinase to promote cell survival (42), so first we knocked down c-KIT expression in  
453 TGCT cells and measured cell proliferation and migration rates. Reduced c-KIT  
454 expression in TERA1 and TERA2 cells substantially attenuated proliferation and  
455 migration, supporting c-KIT-dependent pro-survival activity in TCGT  
456 (**Supplementary Fig. S5A-B**). Next, to explore if the p53-mediated up-regulation of  
457 *KITLG* has a similar pro-survival effect on TGCT cells, we compared proliferation  
458 and migration rates of the p53-REs<sup>+/+</sup> clones (more *KITLG*) relative to the p53-REs<sup>-</sup>-  
459 <sup>-</sup> clones (less *KITLG*). Consistent with the relative reduction in *KITLG* expression

460 levels and the effects of c-KIT knock-down on TGCT proliferation and migration,  
461 p53REs<sup>-/-</sup> clones grew and migrated significantly more slowly than p53-REs<sup>+/+</sup>  
462 clones (**Supplementary Fig. S5C-D**).

463 These results link p53 driven *KITLG*/c-KIT signaling with oncogenic pro-  
464 survival phenotypes in TGCT, such as heightened proliferation and migration. To  
465 determine the impact *KITLG*/c-KIT has on cellular sensitivities to p53-activating  
466 therapies we used cells with reduced c-KIT expression and treated then with Nutlin3.  
467 c-KIT knock-down resulted in a 2-fold increased sensitivity to Nutlin3, and increased  
468 levels of cleaved caspase3, relative to control cells (**Supplementary Fig. S6A-B**).  
469 These data suggest that c-KIT signaling can attenuate cellular chemosensitivities to  
470 p53-activating therapies. To explore if p53-mediated up-regulation of *KITLG* has a  
471 similar effect we measured IC<sub>50</sub> values for Nutlin3 in p53-REs<sup>+/+</sup>, p53-REs<sup>-/-</sup> and  
472 p53RE KI clones for both TERA1 and TERA2 cells, and observed a significant  
473 reduction in IC<sub>50</sub> values in the p53-REs<sup>-/-</sup> cells relative to p53-REs<sup>+/+</sup> cells upon  
474 Nutlin3 treatment (TERA1: 3.0-fold, p = 0.021; TERA2: 1.8-fold, p = 7.1e-04; **Fig.**  
475 **7A**). We were able to rescue the increased Nutlin3 sensitivity of p53RE<sup>-/-</sup> clones in  
476 KI cells (TERA1: 2.2-fold, p = 0.035; TERA2: 1.5-fold, p = 0.033; **Fig. 7A**).  
477 Consistent with these observations, we saw increases in cleaved Caspase3 and  
478 cleaved PARP1 levels in p53-REs<sup>-/-</sup> cells relative to p53-REs<sup>+/+</sup> cells  
479 (**Supplementary Fig. S6C**), but not in the KI cells (**Supplementary Fig. S6D**). To  
480 further test the p53-dependence of these effects, we reduced p53 expression levels and  
481 observed reduced expression of cleaved caspase3 after Nutlin3 treatment  
482 (**Supplementary Fig. S6E**), and an overall insensitivity towards Nutlin3 in both p53-  
483 REs<sup>+/+</sup> and p53-REs<sup>-/-</sup> cells (**Supplementary Fig. S6F**). Thus, *KITLG*/c-KIT  
484 signaling promotes cell survival and attenuates cellular chemosensitivities towards a  
485 p53-activating agent, and these regulations involve the risk locus in *KITLG*.

486 The synthetic viable interaction between *KITLG* and p53 activation by Nutlin3 in  
487 TGCT cancer cells suggests *KITLG* should show similar synthetically viable  
488 interactions with chemotherapeutic agents which lead to DNA damage, given the role  
489 of p53 in responses to DNA damage (9,46). To test this idea, we utilized one p53-  
490 REs<sup>+/+</sup> and one p53-REs<sup>-/-</sup> clone of both TERA1 and TERA2, and screened 317  
491 anti-cancer compounds to identify agents that, like Nutlin3, kill significantly more  
492 cells at lower concentrations in p53-RE<sup>-/-</sup> clones than in p53<sup>+/+</sup> clones



493 **(Supplementary Fig. S7A)**. The screen was performed in duplicate. The Pearson  
494 Correlation Coefficient, a measurement for inter-assay variability, averaged 0.98 and  
495 an average Z-factor, a measure employed in high throughput screens to measure effect  
496 size, of 0.69 for all plates was recorded, leading to high confidence in the primary  
497 screen positive hits **(Supplementary Table S13)**. We identified 198 compounds in  
498 the TERA1 screen and 112 compounds in the TERA2 screen that showed heightened  
499 sensitivity in p53-RE<sup>-/-</sup> cells in at least one of the 4 different concentrations tested  
500 ( $\geq 1.5$  fold in both replicates; **Supplementary Fig. S7B**, blue dots). One hundred of  
501 these agents overlapped between TERA1 and TERA2 (1.7-fold,  $p = 1.1e-21$ ;  
502 **Supplementary Fig. S7B**, Venn diagram), suggesting a potential shared mechanism  
503 underling the differential sensitivities. These 100 agents can be classified into 14  
504 different compound classes (**Fig. 7B**; **Supplementary Table S14**). Consistent with  
505 our previous results, two *MDM2* inhibitors in the panel of compounds, Nutlin3 and  
506 Serdemetan, were among the 100 overlapping agents (**Fig. 7B**).

507 In TERA1, the 198 compounds were significantly enriched in topoisomerase  
508 inhibitors after correction for multiple hypothesis testing (**Fig. 7C**, left panel). In  
509 TERA2, the 112 compounds were also significantly enriched in topoisomerase  
510 inhibitors, but also in PI3K/AKT/mTOR inhibitors and receptor tyrosine kinase  
511 (RTK) inhibitors (**Fig. 7C**, right panel). We found a significant and consistent  
512 enrichment of topoisomerase inhibitors in both cell lines (14 compounds in TERA1  
513 [100%] and 10 compounds in TERA2 [71%] of 14 Topo inhibitors screened; **Fig. 7B-**  
514 **C**). Topoisomerase inhibitors induce DNA damage and p53 activation (46,47). To  
515 validate the genotype-specific effects of the topoisomerase inhibitors, we determined  
516 the IC<sub>50</sub> values of three of them, Doxorubicin, Camptothecin, and Topotecan, using  
517 MTT measurements in multiple clones of TERA1 cells with differing genotypes. All  
518 three agents showed a significant reduction of IC<sub>50</sub> values in the p53-REs<sup>-/-</sup> clones  
519 relative to the p53-REs<sup>+/+</sup> clones (**Fig. 7D**, grey bars versus red bars). We were able  
520 to rescue this increased sensitivity to topoisomerase inhibitors in the p53RE<sup>-/-</sup> clones  
521 in KI cells (**Fig. 7D**, orange versus red bars). Together, these results demonstrate a  
522 synthetically viable interaction between the germline risk locus and multiple p53-  
523 activating agents that lead to DNA damage.

524 **9. Inhibition of c-KIT signaling and p53 activation interact to kill treatment**  
525 **resistant cancer cells**

526        There are many RTK inhibitors that are current therapeutic agents which inhibit  
527 c-KIT activity (48). If p53-mediated *KITLG*-dependent pro-survival signaling can  
528 attenuate chemosensitivity to p53-activating agents, RTK inhibitors should be able to  
529 interact synergistically with p53-activating agents to kill TGCT cells. We therefore  
530 tested which RTK inhibitor (known to inhibit c-KIT) kills TCGT cells most  
531 efficiently. Of the five FDA-approved RTKs analyzed, Pazopanib, Imatinib,  
532 Nilotinib, Sunitinib and Dasatinib, the most potent was Dasatinib (**Supplementary**  
533 **Fig. S7C**). To determine potential synergy of RTKs with Nutlin3 in TGCT, we  
534 treated TERA1 and TERA2 cells with Dasatinib, and quantitated potential drug-drug  
535 interactions by calculating Combination Indices (CI). We observed clear synergistic  
536 interactions (CI <1) between Nutlin3 and Dasatinib in both TERA1 and TERA2 p53-  
537 REs+/+ cells (**Fig. 7E**, grey bars). These results further support an inhibitory role for  
538 p53/*KITLG* pro-survival signaling in cellular responses to p53-activating agents.

539        To more directly test whether or not the synergistic interaction between  
540 Dasatinib and Nutlin3 is mediated by the p53-dependent up-regulation of *KITLG*, we  
541 determined the CI values in TERA1 and TERA2 p53-REs-/- cells, wherein p53  
542 cannot induce *KITLG* expression after p53 activation upon Nutlin3 treatment as  
543 shown in **Fig. 6G**. Consistent with the requirement of the p53-dependent activation of  
544 *KITLG*, no synergy between Dasatinib and Nutlin3 was detected in p53-REs-/- cells  
545 (**Fig. 7E**, red bars).

546        To further investigate if c-KIT inhibition can interact synergistically with p53-  
547 activating agents to kill TGCT cells, we explored the interaction between Dasatinib  
548 and multiple DNA-damaging chemotherapeutics known to activate p53. We focused  
549 on the 3 topoisomerase inhibitors (Doxorubicin, Camptothecin and Topotecan), as  
550 well as Cisplatin, a chemotherapeutic agent used to treat TGCT, and which induces  
551 DNA damage and p53. In both TERA1 and TERA2, Dasatinib demonstrated  
552 significant levels of synergy with each of the DNA-damaging agents tested in p53-  
553 REs+/+ cells (**Supplementary Fig. S7D-E**). Similar to Nutlin3, no synergy was  
554 detected in p53-REs-/- cells of either cell lines for any combination of agents  
555 (**Supplementary Fig. S7D-E**). Furthermore, the synergistic interaction between  
556 Dasatinib and the p53-activating agents Nutlin3 and Doxorubin could be rescued by  
557 knocking in the p53-bound region in *KITLG* (**Fig. 7E**, orange bars).

558 As our results thus far were limited to TERA1 and TERA2 cells, we explored  
559 potential interactions in four additional TGCT cell lines with wild-type p53 and at  
560 least one copy of the haplotype containing the *KITLG* risk allele SNPs; GH (risk/non-  
561 risk), Susa (risk/non-risk), 2102EP (risk/risk) and GCT27 (risk/risk). Consistent with  
562 the observations in TERA1 and TERA2 cells, Dasatinib synergistically interacted  
563 with Nutlin3 across all the cell lines (**Fig. 7F**, red bars) and also with Doxorubicin  
564 (**Fig. 7F**, blue bars). Together, these data indicate that *KITLG*/c-KIT pro-survival  
565 signaling can attenuate chemosensitivity to p53-activating agents in TGCT and that  
566 this attenuation is dependent on the p53-regulated *KITLG* enhancer lying within the  
567 germline TGCT-risk locus.

568 Thus, a more effective therapeutic strategy for TGCT patients could be to  
569 modulate both the cell death and cell survival functions of p53, through co-inhibition  
570 of p53/*KITLG*-mediated pro-survival signaling together with the co-activation of p53-  
571 mediated anti-survival signaling. Such a therapeutic combination could provide an  
572 alternative for patients with treatment-resistant disease (49). To investigate this idea,  
573 we explored synergistic interactions between c-KIT inhibitor Dasatinib and p53  
574 activators in cisplatin-resistant clones of GCT27 (GCT27-CR) and Susa (Susa-CR)  
575 (50), as well as in the intrinsically cisplatin-resistant TGCT cell line 2102EP (51).  
576 Similar to the observations in the cisplatin-sensitive TGCT cell lines, Dasatinib and  
577 Doxorubicin interacted synergistically to kill all three cisplatin-resistant clones and  
578 cell lines (**Fig. 7F**). To determine if the combination treatment could show a greater  
579 efficacy in treating tumors, we generated a subcutaneous xenograft model using the  
580 2102EP cell line. Doxorubicin and Dasatinib were given either alone or in  
581 combination. Consistent with the observations made in cell culture, treatment of mice  
582 engrafted with 2102EP cells revealed stronger anti-tumoral effects with the  
583 Dasatinib/Doxorubicin pair relative to single drug treatments ( $p = 0.0077$  versus the  
584 Dasatinib group, and  $p = 0.018$  versus the Doxorubicin group; **Fig. 7G**). This dosing  
585 regimen was well tolerated with no body weight loss in mice (**Supplementary Fig.**  
586 **S7F**).

587

588 **Discussion**

589 Cancer therapies targeting somatic mutations are associated with variable  
590 responses, eventual high failure rates and the development of drug resistance. Somatic  
591 genetic heterogeneity among tumors is a major factor contributing to differences in  
592 disease progression and therapeutic response (1). In this study, we demonstrate that  
593 germline cancer-risk SNPs could influence cancer progression and potentially provide  
594 information guiding precision medicine therapy decisions. Our approach focused on  
595 cancer-risk SNPs in the p53 signaling pathway and provided evidence that they can  
596 have persistent effects on tumors in regards to p53 mutational status, gene expression,  
597 cellular signaling, progression and chemo-sensitivity. First, we demonstrated that  
598 cancer risk SNPs in the p53 pathway genes can influence whether or not a tumor  
599 contains a somatically mutated *TP53* locus (**Fig. 1-2**). We demonstrated that the  
600 cancer risk SNP, the p53 poly(A) SNP rs78378222 affects the expression of both  
601 wild-type and mutant p53 in tumors and interacts with p53 somatic mutational status  
602 to modify both cancer susceptibility and progression (**Fig. 1-4**). We went on to  
603 demonstrate that p53 pathway genes that harbour cancer risk SNPs, as a whole, are  
604 more likely to associate with differential p53-mediated cancer cell killing relative  
605 to other p53 pathway genes. More specifically for *KITLG*, we demonstrated that  
606 the risk alleles of the TCGT-associated SNPs result in the p53-dependent increased  
607 expression of the pro-survival target gene and can lead to an attenuation of p53-  
608 mediated responses to genotoxic therapies, as well as faster progression (**Fig. 5-7**).  
609 Finally, we determined that, when the pro-survival signal is inhibited, there is more  
610 effective p53-mediated cancer cell killing (**Fig. 7**). Our observations illustrate how  
611 cancer susceptibility loci can interact with cancer driver genes to influence cancer cell  
612 behaviors, cancer progression, identify novel drug-drug interactions and direct  
613 molecularly-informed on-targeted combinatorial therapies.

614 The p53 stress response pathway inhibits cell survival, mediating both tumor  
615 suppression and cellular responses to many cancer therapeutics (52). p53 also targets  
616 pro-survival genes. Activation of these genes in tumors retaining wild-type p53  
617 provide a survival advantage (53). For example, the p53 target gene, *TIGAR*, which  
618 protects cells from DNA damage-induced reactive oxygen species (ROS) and  
619 apoptosis, promotes tumorigenesis in a mouse model of intestinal adenoma. We  
620 provide human genetic evidence that also supports a tumor-promoting role of p53  
621 pro-survival activities and, in the case of the TGCT risk locus, points to the

622 development of more effective therapy combinations through the inhibition of these  
623 pro-survival activities in tumors that retain p53 activity. Less than 1% of TGCTs from  
624 the TCGA cohort have a mutated p53 gene. Although TGCTs are one of the most  
625 curable solid tumors, men diagnosed with metastatic TGCT develop platinum  
626 resistant disease and die at an average age of 32 years (49). There have been few new  
627 treatments developed in the last two decades, and current therapeutic approaches can,  
628 importantly in context of a cancer of young men, result in significant survivorship  
629 issues, including sustained morbidities and delayed major sequelae (49,54). There is a  
630 need for more effective treatments with fewer side effects, to improve the survival  
631 and quality of life of these patients. Our observations suggest the TGCT *KITLG* risk  
632 allele in the polymorphic p53 enhancer leads to increased p53-dependent activation of  
633 the pro-survival target gene, *KITLG*, which increases TGCT survival rather than  
634 senescence/apoptosis in the presence of active p53 (**Fig. 7**). We demonstrate that co-  
635 inhibition of c-KIT and p53 activation interact synergistically to kill platinum-  
636 resistant TGCTs with a drug combination (Dasatinib and Doxorubicin) that had  
637 limited toxicity in a Phase II clinical trial (55) (**Fig. 7**), suggesting that an effective  
638 therapeutic strategy for treatment-resistant TGCTs could be to modulate both the cell-  
639 death and cell-survival functions of WT p53 cancers.

640 Heritable genetic variants can influence the evolution of cancer genomes in  
641 patients (3,4), potentially through altered tissue mutation rates, heightened global  
642 genome instability (56), or heightened specific mutational processes, for example via  
643 inherited variants in pathways such as BRCA1/2, MMR, and the APOBEC3 gene  
644 cluster (57). Understanding in BRCA1/2 mutation carriers of the interactions between  
645 the inherited variants and somatic genomes of the cancer has already led to better,  
646 more personalized treatment options for BRCA1/2 mutation carriers with PARP  
647 inhibitors. Here we provide evidence that this could also be extended to the more  
648 frequently inherited cancer risk variants identified in GWAS. We demonstrated that  
649 cancer-risk p53 pathway SNPs and p53 mutational status can interact to affect tumors  
650 in a way that offers potential therapeutic insights. *MDM2* amplification and p53  
651 mutation show a mutual exclusivity in somatic cancer genomes of soft tissue  
652 sarcomas, osteosarcomas and glioblastoma, which may extend to other cancer types  
653 (58), suggesting that the amplification and over-expression of this p53 inhibitor  
654 reduces the necessity of cancers to mutate p53. Support of this hypothesis comes from

655 a study where p53 was preferentially mutated in murine B-cell lymphomas that had  
656 been engineered to express lower *MDM2* levels (59). We show that the up-regulation  
657 of a pro-survival p53 target gene associates with increased risk for TGCT that rarely  
658 mutates p53, which supports the idea that inherited genetic variants could also reduce  
659 the necessity of cancers to mutate p53 by increasing the pro-survival/pro-tumor  
660 activities of wild-type p53. This hypothesis points to the development of more  
661 effective therapy combinations in tumors that retain p53 activity through the  
662 inhibition of pro-survival activities, as our work on the *KITLG* locus in TGCT  
663 suggests.

664 Unlike other tumor suppressors, complete loss of p53 activity is not a  
665 requirement for cancer initiation. Reduction of p53 activity below a critical threshold  
666 is apparently necessary and sufficient for cancer development (60). Another attribute  
667 of p53 cancer genetics is the abundance of missense driver mutations relative to  
668 simple deletions. These missense mutations may benefit cancers not simply through  
669 loss of p53 function, but also through dominant-negative and gain-of-function  
670 activities (61), which may include inhibition of p53 expression, or its ability to  
671 heterodimerize with wild-type p53, thereby affecting DNA binding and  
672 transcriptional regulation. Described gain-of-function activities often include novel  
673 interactions with transcription factors and chromatin-bound protein complexes (8). In  
674 mice, knock-in p53 gain-of-function mutants displayed a more diverse set of, and  
675 more highly metastatic tumors than p53 knock-out mutants (13,14). Many of the  
676 factors that regulate wild-type p53 tumor suppression can also regulate mutant p53,  
677 including its pro-cancer activities. For example, wild-type p53 mice that express  
678 lower levels of *MDM2* show increased p53 levels, a better p53 stress response, and  
679 greater tumor suppression, resulting in later and reduced tumor onset in many tissue  
680 types. Mutant p53 levels are also increased in these murine models, but cancers are  
681 found to arise earlier and harbor gain-of-function metastatic phenotypes (20).

682 Our SNP associations with inverted cancer risk and somatic p53 mutational  
683 status in humans reveal a similar scenario. Specifically, we demonstrated that the C-  
684 allele of the p53 poly(A) SNP which can lead to decreased WT and mutant p53 levels  
685 in tumors (**Fig. 3**), associates with an increased risk of wild-type p53 cancers, but  
686 decreased risk of sub-types with primarily mutant p53 (**Fig. 2**). For example, women  
687 with the minor allele associated with an increased risk for the more p53 wild-type

688 breast and ovarian subtypes and a decreased risk for the more mutant subtypes.  
689 Together, these observations support a role for germline p53 pathway SNPs not only  
690 modulating risk of disease and tumor biology in p53 WT cancers but also in p53  
691 mutant cancers, wherein alleles that increase mutant p53 levels would also increase its  
692 pro-cancer activities.

693

## 694 **Methods**

### 695 **Analysis of oncogenic *TP53* missense mutations in breast and ovarian cancers**

696 We curated *TP53* pathogenic missense mutations by integrating up-to-date functional  
697 evidence from both literature and databases. Specifically, we combined the 2 lists of  
698 *TP53* driver mutations in human tumors (62,63) to obtain a list of 323 *TP53* driver  
699 mutations. To determine which of these 323 *TP53* driver mutations are oncogenic  
700 (either dominant negative or gain of function), we relied on two sources of  
701 annotations: 188 missense mutations were curated to be oncogenic in IARC *TP53*  
702 Database (release 18) (64); 1101 missense mutations were ascertained by human  
703 cancer cell-based saturation mutagenesis screen (65) (filter criteria:  
704 A549\_p53WT\_Nutlin-3\_Z-score > 1 and A549\_p53NULL\_Nutlin-3\_Z-score > 1 and  
705 A549\_p53NULL\_Etoposide\_Z-score < -1). In total, we were able to find 218 out of  
706 323 *TP53* pathogenic mutations are oncogenic (**Supplementary Table S16**).

707 2,262 *TP53* mutations in 2,201 unique breast cancer samples (from 12 studies;  
708 exclude 737 duplicate mutations in samples sequenced by multiple studies) and 492  
709 *TP53* mutations in 471 unique ovarian cancer samples (from 3 studies; exclude 477  
710 duplicate mutations in samples sequenced by multiple studies) were downloaded from  
711 cBioPortal on 2018-09-14 (<http://www.cbioportal.org>). All *TP53* missense mutations  
712 were extracted and matched with the curated lists of pathogenic and oncogenic *TP53*  
713 missense mutations as described above. Then cancers with pathogenic missense  
714 mutations and oncogenic missense mutations were counted. Specifically, 1113 out of  
715 2262 (49.2%) *TP53* mutations in breast cancer are pathogenic missense mutations, of  
716 which 1012 (90.9%) are oncogenic. Similarly, 260 out of 492 (52.8%) *TP53*  
717 mutations in ovarian cancer are pathogenic missense mutations, of which 228 (87.7%)  
718 are oncogenic.

719

720 **Analysis for subtype heterogeneity SNPs with Breast and Ovarian cancer**  
721 **association studies**

722 Summary statistics of GWASs for breast cancer susceptibility were downloaded on  
723 2018-03-12 ([http://bcac.ccge.medschl.cam.ac.uk/bcacdata/oncoarray/gwas-icogs-and-](http://bcac.ccge.medschl.cam.ac.uk/bcacdata/oncoarray/gwas-icogs-and-oncoarray-summary-results/)  
724 [oncoarray-summary-results/](http://bcac.ccge.medschl.cam.ac.uk/bcacdata/oncoarray/gwas-icogs-and-oncoarray-summary-results/)), which included summary statistics from case-control  
725 association analyses for ER-positive breast cancer cases (ER+BC) and ER-negative  
726 breast cancer cases (ER-BC) compared against disease-free controls. Summary  
727 statistics of GWASs for ovarian cancer susceptibility were downloaded on 2018-04-  
728 16 (<https://www.ebi.ac.uk/gwas/downloads/summary-statistics>), which included  
729 summary statistics for SNP association with low grade serous ovarian cancer  
730 (LGSOC), and with high grade serous ovarian cancer (HGSOC). Estimates of effect  
731 sizes [log(OR)s] for subtype-specific case-control studies and their corresponding  
732 standard errors were utilized for meta- and heterogeneity-analyses using METAL  
733 (2011-03-25 release) (66), under an inverse variance fixed-effect model. Cochran's Q  
734 statistic was calculated to test for heterogeneity and the  $I^2$  statistic to quantify the  
735 proportion of the total variation that was caused by heterogeneity.

736

737 **Assigning p53 mutational status to TCGA tumour samples and the association**  
738 **testing**

739 The p53 gene mutation profiles in TCGA primary tumors were downloaded from the  
740 TCGA data portal (<https://gdc-portal.nci.nih.gov/>). These p53 mutation calls (1,245  
741 unique mutations in 3,956 tumors) were classified into pathogenic (1,097 unique  
742 mutations in 3,895 tumors), benign (143 unique mutations in 148 tumors), or unclear  
743 (5 unique mutations in 5 tumors) based on curated datasets (63,64). The p53  
744 pathogenic missense mutations were further annotated as loss of function, or  
745 oncogenic (either dominant negative or gain of function) as described above. Tumors  
746 without p53 mutations were assigned as p53 WT; Tumors with at least one pathogenic  
747 p53 mutations were assigned as p53 mutant; Tumors with only benign and/or unclear  
748 p53 mutations were assigned as p53 benign/unclear; Tumors with only pathogenic  
749 p53 missense mutations were assigned as p53 missense mutant; Tumors with only  
750 oncogenic p53 missense mutations were assigned as p53 oncogenic missense mutant.  
751 The copy number profiles of *TP53* in TCGA primary tumors were retrieved from the



752 Broad GDAC Firehose (<https://gdac.broadinstitute.org/>) through the fbget tool  
753 (v0.1.11 released Oct 31 2017). The association testing was performed using a two-  
754 sided Fisher exact test with PLINK (67).

755

### 756 **Cancer GWAS SNPs**

757 The GWAS catalog was downloaded on 2018-02-28 (<https://www.ebi.ac.uk/gwas/>).  
758 We selected the GWAS significant lead SNPs (p-value <5e-08) in Europeans, and  
759 retrieved the associated proxy SNPs using the 1000 Genomes phase 3 data through  
760 the web server: rAggr (<http://raggr.usc.edu>). In brief, we selected the GWAS lead  
761 SNPs that were identified in European ancestry cohorts, and only defined proxies that  
762 met the following criteria: Population: EUR; Min MAF:  $\geq 0.01$ ; R2 range:  $\geq 0.8$ ; Max  
763 distance: 500KB; Max # Mendel error: 1; HWE p-value: 1e-6; Min genotype %: 95.  
764 All proxies were mapped to the Ensembl Release 91 (dbSNP build 150) to retrieve the  
765 hg38 genomic coordinates using R package biomart. In total, we retrieved a total of  
766 283,240 GWAS SNPs. Next, we isolated the 28,592 cancer GWAS SNPs, including  
767 1,225 lead SNPs and 27,367 proxies, by mapping the GWAS SNPs to 106 unique  
768 cancer traits that are distributed into 27 distinct cancer types.

769

### 770 **Pathway enrichment analysis**

771 The pathway gene sets of KEGG and Hallmark were downloaded from the Molecular  
772 Signatures Database (<http://software.broadinstitute.org/gsea/msigdb/index.jsp>). The  
773 known p53 direct target genes were downloaded from (40). cis-eQTL datasets were  
774 obtained from GTEX (<https://gtexportal.org/home/datasets>; V7 and  $qval \leq 0.05$ ),  
775 NESDA/NTR (<https://eqtl.onderzoek.io/index.php?page=download>) and PancanQTL  
776 (<http://bioinfo.life.hust.edu.cn/PancanQTL/download>).

777 The hypergeometric distribution enrichment analysis was performed as described in  
778 (6). Significance was determined using PHYPHER function as implemented in R and  
779 multiple hypotheses testing by Benjamini-Hochberg correction.

780

### 781 **RNA-seq analysis**

782 3' RNA-seq library was prepared using a standardised protocol followed by

783 sequencing using a HiSeq4000 platform (Illumina) at the Oxford Genomics Centre  
784 (Wellcome Trust Centre for Human Genetics, Oxford, UK). Sequencing reads were  
785 mapped to hg19 using the HISAT2 alignment algorithm (version 2.1.0). The aligned  
786 Binary-sequence Alignment Format (BAM) files were used to determine the  
787 transcript counts through featureCounts (version 1.6.2). For differential expression  
788 analysis, the raw read counts were used as input into the R package DESeq2 (version  
789 1.24.0) for analysis.

790

### 791 **eQTL analysis in normal tissue and TCGA tumors**

792 Data for the eQTL analysis of rs78378222 in normal human tissue are from two  
793 studies: the Netherlands Study of Depression and Anxiety (NESDA) and the  
794 Netherlands Twin Register (NTR) that consisted of 4,896 blood samples with  
795 European ancestry (22). Data for the eQTL analysis of rs78378222 in human tumors  
796 were obtained from TCGA (68). The p53 gene expression profiles in TCGA primary  
797 tumors were retrieved from the Broad GDAC Firehose  
798 (<https://gdac.broadinstitute.org/>) through the fbget tool (v0.1.11 released Oct 31  
799 2017). eQTL effects were determined with a linear model approach with p53 mRNA  
800 expression level as dependent variable and SNP genotype values as independent  
801 variable.

802

### 803 **Genotype imputation and population stratification**

804 Genotype data was obtained and filtered as described in (3). Briefly, we obtained  
805 genotype calls from the Birdsuite-processed (69) Affymetrix 6.0 SNP arrays for  
806 matched normal samples from the TCGA data portal (<https://gdc-portal.nci.nih.gov/>),  
807 set low confidence SNP calls to missing, filtered individuals and SNPs with < 95%  
808 call rate and SNPs with MAF < 1% and imputed untyped genotypes using the secure  
809 Michigan Imputation Server (70). We used a PCA analysis over genotypes to remove  
810 samples that did not cluster tightly with Europeans from the HapMap III reference  
811 population.

812

### 813 **TCGA survival analysis**

814 TCGA clinical data was downloaded from recently updated Pan-Cancer Clinical Data  
815 Resource (TCGA-CDR) (71). Overall survival (OS) and progression-free interval  
816 (PFI), the two most accurate clinical outcomes using the current TCGA data, were  
817 added to primary tumors. Of the 7,021 TCGA patients that are clustered tightly with  
818 Europeans, OS and PFI data was available for 6,979 and 6,977 patients, respectively.  
819 A Cox proportional hazards regression model was used to calculate the hazard ratio,  
820 the 95% confidence interval and p values for two-group comparisons. The log-rank  
821 test was used to compare the difference of Kaplan-Meier survival curves.

822

### 823 **GDSC drug sensitivity analysis**

824 *TP53* mutation, copy number, mRNA expression data, and drug IC50 values for the  
825 cancer cell lines were downloaded from Genomics of Drug Sensitivity in Cancer  
826 (GDSC; release-8.1). Specifically, a list of the mutated genes  
827 “mutations\_20191101.csv”, the processed CNV data “cnv\_gistic\_20191101.csv” and  
828 RNAseq gene expression data “rnaseq\_read\_count\_20191101.csv” were downloaded  
829 from <https://cellmodelpassports.sanger.ac.uk/downloads>. The drug response data  
830 (GDSC1\_fitted\_dose\_response\_15Oct19) was downloaded from  
831 [https://www.cancerrxgene.org/downloads/bulk\\_download](https://www.cancerrxgene.org/downloads/bulk_download).

832 Cell lines without p53 mutations were assigned as p53 WT; Cell lines with *TP53*  
833 somatic mutations and copy-number alterations (GISTIC score < 0) were assigned as  
834 p53 mutant and CNV loss; The classified cell lines were further grouped based on the  
835 gene transcript levels: low ( $\leq$  1st quartile), median ( $>$  1st quartile and  $<$  3rd quartile),  
836 high ( $\geq$  3rd quartile). The effects of the mutation status or transcript levels on drug  
837 sensitivity were then determined with a linear model approach with log2 of the IC50  
838 values as dependent variable and mutation status (Fig. 5B) or transcript levels (Fig.  
839 5C-D and 5F-H) as independent variable.

840

### 841 **ChIP-Seq analysis**

842 Reads from 30 p53 ChIP-seq datasets (**Supplementary Table S10**) were downloaded  
843 from the Sequence Read Archive (SRA). All datasets consisted of single ended  
844 Illumina reads. If multiple conditions were used in the same experiment, these were

845 treated as separate datasets. Reads were trimmed using Trimmomatic version 0.32  
846 (72) and bases with leading or trailing quality less than 3, across a 4 base sliding  
847 window with quality less than 15 were trimmed, as were Illumina adaptors. Reads  
848 with greater than 24 bases remaining were retained. Reads were mapped to hg38  
849 using the BWA-mem alignment algorithm version 0.7.12 (73). The resulting BAM  
850 files were filtered to remove unmapped reads, duplicate reads (as identified with  
851 Picard MarkDuplicates 2.8.3 (<http://broadinstitute.github.io/picard/>)) and reads with a  
852 mapping quality score less than 10. Peaks were called using MACS2 (version  
853 2.1.1.20160309) (74) with the appropriate input dataset used as a control and a q-  
854 value cutoff of 0.01. This stringent threshold was selected to avoid overcalling peaks  
855 as a number of studies only had a single replicate for each condition. Insert size was  
856 estimated using the MACS2 predictd function. For datasets with multiple replicates,  
857 only peaks which were at least partially present in at least two replicates were  
858 maintained in the dataset.

859

## 860 **CRISPR/Cas9-mediated genome editing**

861 The Cas9 expression vector was obtained from Addgene (#62988). sgRNAs were  
862 designed and constructed as described previously (75). Briefly, the sgRNA oligos  
863 were designed and analyzed using the CRISPR design tool (<http://crispr.mit.edu/>), and  
864 the ones with highest rating scores were selected. For the human U6 promoter-based  
865 transcription, a guanine (G) base was added to the 5' of the sgRNA when the 20bp  
866 guide sequence did not begin with G. The oligo sequences for the sgRNA synthesis  
867 are listed in **Supplementary Table S15**. Next, the annealed oligos were cloned into  
868 the BbsI restriction sites of the Cas9 expression vector. The donor construct pMK-  
869 RQ-HDR-donor for generating the p53-REs knock in clones was synthesized by  
870 GeneArt Gene Synthesis service and integrated into the G418 resistant vector pMK-  
871 RQ (ThermoFisher). The donor construct rs78378222-HDR-donor was generated for  
872 the homology directed repair (HDR) in Hap1 cells. For genomic deletions,  $5 \times 10^5$  cells  
873 were seeded in a 12-well plate and transfected with 0.5 mg of each sgRNA constructs.  
874 After 24 hours, cells were incubated in puromycin for 48 hour. Subsequently, a  
875 single-cell suspension was prepared and seeded at a low density in 96-well plate for  
876 3-4 weeks. Clones that were derived from more than one cell were excluded from  
877 further experiments. Individual colonies were picked and expanded for PCR-based

878 genotyping with primers outside and inside of the targeting region (**Supplementary**  
879 **Table S15**). Correctly targeted clones were further confirmed by Sanger sequencing  
880 or TagMan genotyping, and the copy number of the heterozygous knock out cells was  
881 confirmed by TaqMan Copy Number Assays. For the knock-in, cells were transfected  
882 with a guide RNA (see sequences in **Supplementary Table S15**) together with a  
883 recombination donor flanked with 1-kb right and left homology arms where the PAM  
884 site was mutated to prevent donor DNA cleavage (a point mutation from CCA to  
885 GCA). Transfected cells were selected by treatment with puromycin and G418 for 48  
886 hours. Based on the same procedures for genomic deletion, correctly targeted clones  
887 were validated by PCR-based genotyping, Sanger sequencing and copy number  
888 determination.

889

### 890 **Cell culture and their treatments**

891 Testicular cancer cell lines TERA1, TERA2, 2102EP, Susa-CR, GH, were cultured in  
892 RPMI (Roswell Park Memorial Institute) medium containing 10% fetal bovine serum  
893 and 1% penicillin/streptomycin according to standard conditions. Susa cells were  
894 cultured in RPMI medium containing 20% fetal bovine and 1%  
895 penicillin/streptomycin. GCT27 and GCT27-CR were cultured in DMEM  
896 (Dulbecco's modified Eagle's medium) supplemented with 10% fetal bovine serum  
897 and 1% penicillin/streptomycin. Hap1 cells were obtained from Horizon Discovery  
898 Ltd and cultured in IMDM (Sigma-Aldrich Co Ltd) supplemented with 10% fetal  
899 bovine serum and 1% penicillin/streptomycin. FuGENE 6 Transfection Reagent  
900 (Promega) was used for DNA transfection. For transfection of siRNA, Lipofectamine  
901 RNAiMAX Transfection Reagent (ThermoFisher) was used.

902

### 903 **Drug screening**

904 Cells were seeded in 384-well plates (flat bottom, black with clear bottom, Greiner) at  
905 density of about 2,000 cells per well in 81µl with cell dispenser (FlexDrop,  
906 PerkinElmer) and liquid handling robotics (JANUS, PerkinElmer) and incubated  
907 overnight. Next, library compounds (**Supplementary Table S14**) were added to a  
908 final concentration of 10µM, 1µM, 100nM or 10nM. Dasatinib (1µM) was added as  
909 positive control and DMSO (Vehicle, 0.1%) was added as negative control. After 72

910 hours, cell were fixed with 4% paraformaldehyde for 10 min, permeabilized with  
911 0.5% Triton X-100 for 5 min, and then stained with 1:1000 dilution of 5mg/ml DAPI  
912 for 5 min. Next, the plates were imaged using a high-content analysis system  
913 (Operetta, PerkinElmer). The image data was analyzed by an image data storage and  
914 analysis system (Columbus, PerkinElmer). The cells with nuclear area>150 and  
915 nuclear intensity<700 were counted, and cell number was used as the viability  
916 readout.

917

### 918 **IC50 and combination index CI analyses**

919 To determine an IC50, 8 multiply diluted concentrations (ranging from 0 to 10  $\mu$ M for  
920 Nutlin3, 0 to 5  $\mu$ M for Doxorubicin, 0 to 0.5  $\mu$ M for Camptothecin and Topotecan, 0  
921 to 20  $\mu$ M for Dasatinib, Sunitinib and Nilotinib, and 0 to 100  $\mu$ M for Imatinib and  
922 Pazopanib) were used including a PBS control for 48 hour treatment and then cell  
923 viability was assessed by a MTT assay. The IC50 was calculated using the Graphpad  
924 Prism software. A constant ratio matrix approach was used to determine the  
925 combination index CI values (76). Single drug data and combination data was entered  
926 into Compusyn software (<http://www.combosyn.com>) to compute CI50 and dose-  
927 reduction index (DRI). CI50 is  $(CX/IC50(X)) + (CY/IC50(Y))$ , where  $(CX/IC50(X))$   
928 is the ratio of the drug X's concentration (CX) in a 50% effective drug mixture to its  
929 50% inhibitory concentration (IC50(X)) when applied alone. The CI50 values  
930 quantitatively depict synergistic (CI<1), additive (CI=1), and antagonistic effects  
931 (CI>1).

932

### 933 ***In vivo* study**

934 All animal procedures were carried out under a Home Office licence (PPL30/3395),  
935 and mice were housed at Oxford University Biomedical Services, UK. 6-8 week-old  
936 female BALB/c nude mice (Charles River, UK) were injected subcutaneously with  
937  $5 \times 10^6$  2102EP cells in a 1:1 mixture of serum-free medium and Matrigel. When the  
938 average tumor volume reached approximately 130 mm<sup>3</sup>, animals were divided into  
939 four groups (6 per group) and received the following treatments: 1. Vehicle group:  
940 p.o. vehicle A (2% DMSO/ 30% PEG300/ dH2O) on day 1-5 & day 8-12, once daily;  
941 i.p. vehicle B (saline) on day 1, 8 and 12, once daily; 2. Doxorubicin group: i.p.

942 Doxorubicin 4mg/ kg (Sigma) in vehicle B on day 1, 8 and 12, once daily; 3. Dasatinib  
943 group: p.o. Dasatinib 25mg/kg (Selleckchem) in vehicle A on day 1-5 and day 8-12,  
944 once daily; 4. Combination group: p.o. Dasatinib 25mg/kg on day 1-5 and day 8-12,  
945 once daily; i.p. Doxorubicin 4mg/ kg 1h after Dasatinib dosing on day 1, 8 and 12,  
946 once daily. Mouse weights and tumor volumes were measured 3 times per week. All  
947 mice were sacrificed on day 12, 2h after final treatments.

948

## 949 **Acknowledgments**

950 This work was funded in part by the Ludwig Institute for Cancer Research, the  
951 Nuffield Department of Medicine, the Development Fund, Oxford Cancer Research  
952 Centre, University of Oxford, UK, by the Intramural Research Program of the  
953 National Institute of Environmental Health Sciences-National Institutes of Health  
954 (Z01-ES100475), and NIH grant (DP5-OD017937), US, and by the S-CORT  
955 Consortium from the Medical Research Council and Cancer Research UK.

956

## 957 **Declaration of Interests**

958 The authors declare no competing interests.

959

## 960 **References**

- 961 1. Dancey JE, Bedard PL, Onetto N, Hudson TJ. The genetic basis for cancer  
962 treatment decisions. *Cell* **2012**;148(3):409-20
- 963 2. Huang M, Shen A, Ding J, Geng M. Molecularly targeted cancer therapy:  
964 some lessons from the past decade. *Trends Pharmacol Sci* **2014**;35(1):41-50
- 965 3. Carter H, Marty R, Hofree M, Gross AM, Jensen J, Fisch KM, *et al.*  
966 Interaction Landscape of Inherited Polymorphisms with Somatic Events in  
967 Cancer. *Cancer discovery* **2017**;7(4):410-23
- 968 4. Lu C, Xie M, Wendl MC, Wang J, McLellan MD, Leiserson MD, *et al.*  
969 Patterns and functional implications of rare germline variants across 12 cancer  
970 types. *Nature communications* **2015**;6:10086
- 971 5. Yurgelun MB, Chenevix-Trench G, Lippman SM. Translating Germline  
972 Cancer Risk into Precision Prevention. *Cell* **2017**;168(4):566-70
- 973 6. Stracquadanio G, Wang XT, Wallace MD, Grawenda AM, Zhang P, Hewitt J,  
974 *et al.* The importance of p53 pathway genetics in inherited and somatic cancer  
975 genomes. *Nature Reviews Cancer* **2016**;16(4):251-65
- 976 7. Martincorena I, Raine KM, Gerstung M, Dawson KJ, Haase K, Van Loo P, *et*  
977 *al.* Universal Patterns of Selection in Cancer and Somatic Tissues. *Cell*  
978 **2017**;171(5):1029-41 e21

- 979 8. Kasthuber ER, Lowe SW. Putting p53 in Context. *Cell* **2017**;170(6):1062-  
980 78
- 981 9. Bouwman P, Jonkers J. The effects of deregulated DNA damage signalling on  
982 cancer chemotherapy response and resistance. *Nature reviews Cancer*  
983 **2012**;12(9):587-98
- 984 10. Lowe SW, Ruley HE, Jacks T, Housman DE. P53-Dependent Apoptosis  
985 Modulates the Cytotoxicity of Anticancer Agents. *Cell* **1993**;74(6):957-67
- 986 11. Weinstein JN, Myers TG, O'Connor PM, Friend SH, Fornace AJ, Jr., Kohn  
987 KW, *et al.* An information-intensive approach to the molecular pharmacology  
988 of cancer. *Science* **1997**;275(5298):343-9
- 989 12. Kotler E, Shani O, Goldfeld G, Lotan-Pompan M, Tarcic O, Gershoni A, *et al.*  
990 A Systematic p53 Mutation Library Links Differential Functional Impact to  
991 Cancer Mutation Pattern and Evolutionary Conservation. *Molecular cell*  
992 **2018**;71(1):178-90 e8
- 993 13. Lang GA, Iwakuma T, Suh YA, Liu G, Rao VA, Parant JM, *et al.* Gain of  
994 function of a p53 hot spot mutation in a mouse model of Li-Fraumeni  
995 syndrome. *Cell* **2004**;119(6):861-72
- 996 14. Olive KP, Tuveson DA, Ruhe ZC, Yin B, Willis NA, Bronson RT, *et al.*  
997 Mutant p53 gain of function in two mouse models of Li-Fraumeni syndrome.  
998 *Cell* **2004**;119(6):847-60
- 999 15. Bykov VJN, Eriksson SE, Bianchi J, Wiman KG. Targeting mutant p53 for  
1000 efficient cancer therapy. *Nature reviews Cancer* **2018**;18(2):89-102
- 1001 16. Wade M, Li YC, Wahl GM. MDM2, MDMX and p53 in oncogenesis and  
1002 cancer therapy. *Nature reviews Cancer* **2013**;13(2):83-96
- 1003 17. Chen L, Agrawal S, Zhou W, Zhang R, Chen J. Synergistic activation of p53  
1004 by inhibition of MDM2 expression and DNA damage. *Proceedings of the*  
1005 *National Academy of Sciences of the United States of America*  
1006 **1998**;95(1):195-200
- 1007 18. Hoe KK, Verma CS, Lane DP. Drugging the p53 pathway: understanding the  
1008 route to clinical efficacy. *Nature Reviews Drug Discovery* **2014**;13(3):217-36
- 1009 19. Suh YA, Post SM, Elizondo-Fraire AC, Maccio DR, Jackson JG, El-Naggar  
1010 AK, *et al.* Multiple stress signals activate mutant p53 in vivo. *Cancer Res*  
1011 **2011**;71(23):7168-75
- 1012 20. Terzian T, Suh YA, Iwakuma T, Post SM, Neumann M, Lang GA, *et al.* The  
1013 inherent instability of mutant p53 is alleviated by Mdm2 or p16INK4a loss.  
1014 *Genes & development* **2008**;22(10):1337-44
- 1015 21. Yue X, Zhao Y, Xu Y, Zheng M, Feng Z, Hu W. Mutant p53 in Cancer:  
1016 Accumulation, Gain-of-Function, and Therapy. *J Mol Biol*  
1017 **2017**;429(11):1595-606
- 1018 22. Jansen R, Hottenga JJ, Nivard MG, Abdellaoui A, Laport B, de Geus EJ, *et al.*  
1019 Conditional eQTL analysis reveals allelic heterogeneity of gene expression.  
1020 *Human molecular genetics* **2017**;26(8):1444-51
- 1021 23. Consortium GT. The Genotype-Tissue Expression (GTEx) project. *Nature*  
1022 *genetics* **2013**;45(6):580-5
- 1023 24. Gong J, Mei S, Liu C, Xiang Y, Ye Y, Zhang Z, *et al.* PancanQTL: systematic  
1024 identification of cis-eQTLs and trans-eQTLs in 33 cancer types. *Nucleic acids*  
1025 *research* **2018**;46(D1):D971-D6
- 1026 25. Cancer Genome Atlas N. Comprehensive molecular portraits of human breast  
1027 tumours. *Nature* **2012**;490(7418):61-70



- 1028 26. Cancer Genome Atlas Research N. Integrated genomic analyses of ovarian  
1029 carcinoma. *Nature* **2011**;474(7353):609-15
- 1030 27. Michailidou K, Lindstrom S, Dennis J, Beesley J, Hui S, Kar S, *et al.*  
1031 Association analysis identifies 65 new breast cancer risk loci. *Nature*  
1032 **2017**;551(7678):92-4
- 1033 28. Phelan CM, Kuchenbaecker KB, Tyrer JP, Kar SP, Lawrenson K, Winham SJ,  
1034 *et al.* Identification of 12 new susceptibility loci for different histotypes of  
1035 epithelial ovarian cancer. *Nature genetics* **2017**;49(5):680-91
- 1036 29. Melin BS, Barnholtz-Sloan JS, Wrensch MR, Johansen C, Il'yasova D,  
1037 Kinnersley B, *et al.* Genome-wide association study of glioma subtypes  
1038 identifies specific differences in genetic susceptibility to glioblastoma and  
1039 non-glioblastoma tumors. *Nature genetics* **2017**;49(5):789-94
- 1040 30. Stacey SN, Helgason H, Gudjonsson SA, Thorleifsson G, Zink F, Sigurdsson  
1041 A, *et al.* New basal cell carcinoma susceptibility loci. *Nature communications*  
1042 **2015**;6:6825
- 1043 31. Basu S, Murphy ME. Genetic Modifiers of the p53 Pathway. *Cold Spring*  
1044 *Harb Perspect Med* **2016**;6(4):a026302
- 1045 32. Milne RL, Kuchenbaecker KB, Michailidou K, Beesley J, Kar S, Lindstrom S,  
1046 *et al.* Identification of ten variants associated with risk of estrogen-receptor-  
1047 negative breast cancer. *Nature genetics* **2017**;49(12):1767-78
- 1048 33. Stacey SN, Sulem P, Jonasdottir A, Masson G, Gudmundsson J, Gudbjartsson  
1049 DF, *et al.* A germline variant in the TP53 polyadenylation signal confers  
1050 cancer susceptibility. *Nature genetics* **2011**;43(11):1098-103
- 1051 34. Burckstummer T, Banning C, Hainzl P, Schobesberger R, Kerzendorfer C,  
1052 Pauler FM, *et al.* A reversible gene trap collection empowers haploid genetics  
1053 in human cells. *Nature methods* **2013**;10(10):965-71
- 1054 35. Liberzon A, Birger C, Thorvaldsdottir H, Ghandi M, Mesirov JP, Tamayo P.  
1055 The Molecular Signatures Database (MSigDB) hallmark gene set collection.  
1056 *Cell Syst* **2015**;1(6):417-25
- 1057 36. Gurtner A, Starace G, Norelli G, Piaggio G, Sacchi A, Bossi G. Mutant p53-  
1058 induced up-regulation of mitogen-activated protein kinase kinase 3 contributes  
1059 to gain of function. *The Journal of biological chemistry* **2010**;285(19):14160-9
- 1060 37. Solomon H, Dinowitz N, Pateras IS, Cooks T, Shetzer Y, Molchadsky A, *et*  
1061 *al.* Mutant p53 gain of function underlies high expression levels of colorectal  
1062 cancer stem cells markers. *Oncogene* **2018**;37(12):1669-84
- 1063 38. Robles AI, Harris CC. Clinical outcomes and correlates of TP53 mutations  
1064 and cancer. *Cold Spring Harbor perspectives in biology* **2010**;2(3):a001016
- 1065 39. Hientz K, Mohr A, Bhakta-Guha D, Efferth T. The role of p53 in cancer drug  
1066 resistance and targeted chemotherapy. *Oncotarget* **2017**;8(5):8921-46
- 1067 40. Fischer M. Census and evaluation of p53 target genes. *Oncogene*  
1068 **2017**;36(28):3943-56
- 1069 41. Iorio F, Knijnenburg TA, Vis DJ, Bignell GR, Menden MP, Schubert M, *et al.*  
1070 A Landscape of Pharmacogenomic Interactions in Cancer. *Cell*  
1071 **2016**;166(3):740-54
- 1072 42. Lennartsson J, Ronnstrand L. Stem cell factor receptor/c-Kit: from basic  
1073 science to clinical implications. *Physiological reviews* **2012**;92(4):1619-49
- 1074 43. Zeron-Medina J, Wang X, Repapi E, Campbell MR, Su D, Castro-Giner F, *et*  
1075 *al.* A polymorphic p53 response element in KIT ligand influences cancer risk  
1076 and has undergone natural selection. *Cell* **2013**;155(2):410-22

- 1077 44. Turnbull C, Rapley EA, Seal S, Pernet D, Renwick A, Hughes D, *et al.*  
1078 Variants near DMRT1, TERT and ATF7IP are associated with testicular germ  
1079 cell cancer. *Nature genetics* **2010**;42(7):604-U178
- 1080 45. Litchfield K, Levy M, Orlando G, Loveday C, Law PJ, Migliorini G, *et al.*  
1081 Identification of 19 new risk loci and potential regulatory mechanisms  
1082 influencing susceptibility to testicular germ cell tumor. *Nature genetics*  
1083 **2017**;49(7):1133-+
- 1084 46. Vogelstein B, Lane D, Levine AJ. Surfing the p53 network. *Nature*  
1085 **2000**;408(6810):307-10
- 1086 47. Pommier Y. Topoisomerase I inhibitors: camptothecins and beyond. *Nature*  
1087 *reviews Cancer* **2006**;6(10):789-802
- 1088 48. Flaherty KT, Hodi FS, Fisher DE. From genes to drugs: targeted strategies for  
1089 melanoma. *Nature reviews Cancer* **2012**;12(5):349-61
- 1090 49. Litchfield K, Levy M, Huddart RA, Shipley J, Turnbull C. The genomic  
1091 landscape of testicular germ cell tumours: from susceptibility to treatment. *Nat*  
1092 *Rev Urol* **2016**;13(7):409-19
- 1093 50. Noel EE, Yeste-Velasco M, Mao X, Perry J, Kudahetti SC, Li NF, *et al.* The  
1094 association of CCND1 overexpression and cisplatin resistance in testicular  
1095 germ cell tumors and other cancers. *The American journal of pathology*  
1096 **2010**;176(6):2607-15
- 1097 51. Koster R, di Pietro A, Timmer-Bosscha H, Gibcus JH, van den Berg A,  
1098 Suurmeijer AJ, *et al.* Cytoplasmic p21 expression levels determine cisplatin  
1099 resistance in human testicular cancer. *The Journal of clinical investigation*  
1100 **2010**;120(10):3594-605
- 1101 52. Vazquez A, Bond EE, Levine AJ, Bond GL. The genetics of the p53 pathway,  
1102 apoptosis and cancer therapy. *Nat Rev Drug Discov* **2008**;7(12):979-87
- 1103 53. Kruiswijk F, Labuschagne CF, Vousden KH. p53 in survival, death and  
1104 metabolic health: a lifeguard with a licence to kill. *Nat Rev Mol Cell Bio*  
1105 **2015**;16(7):393-405
- 1106 54. Kerns SL, Fung C, Monahan PO, Ardeshir-Rouhani-Fard S, Abu Zaid MI,  
1107 Williams AM, *et al.* Cumulative Burden of Morbidity Among Testicular  
1108 Cancer Survivors After Standard Cisplatin-Based Chemotherapy: A Multi-  
1109 Institutional Study. *J Clin Oncol* **2018**:JCO2017770735
- 1110 55. Ravandi F, O'Brien S, Thomas D, Faderl S, Jones D, Garris R, *et al.* First  
1111 report of phase 2 study of dasatinib with hyper-CVAD for the frontline  
1112 treatment of patients with Philadelphia chromosome-positive (Ph<sup>+</sup>) acute  
1113 lymphoblastic leukemia. *Blood* **2010**;116(12):2070-7
- 1114 56. Grobner SN, Worst BC, Weischenfeldt J, Buchhalter I, Kleinheinz K,  
1115 Rudneva VA, *et al.* The landscape of genomic alterations across childhood  
1116 cancers. *Nature* **2018**;555(7696):321-7
- 1117 57. PCAWG Germline Working group. Germline determinants of the somatic  
1118 mutation landscape in 2,642 cancer genomes. *bioRxiv* **2017**
- 1119 58. Saiki AY, Caenepeel S, Cosgrove E, Su C, Boedigheimer M, Oliner JD.  
1120 Identifying the determinants of response to MDM2 inhibition. *Oncotarget*  
1121 **2015**;6(10):7701-12
- 1122 59. Alt JR, Greiner TC, Cleveland JL, Eischen CM. Mdm2 haplo-insufficiency  
1123 profoundly inhibits Myc-induced lymphomagenesis. *The EMBO journal*  
1124 **2003**;22(6):1442-50
- 1125 60. Hohenstein P. Tumour suppressor genes--one hit can be enough. *PLoS*  
1126 *biology* **2004**;2(2):E40

- 1127 61. Muller PA, Vousden KH. Mutant p53 in cancer: new functions and therapeutic  
1128 opportunities. *Cancer cell* **2014**;25(3):304-17
- 1129 62. Bailey MH, Tokheim C, Porta-Pardo E, Sengupta S, Bertrand D, Weerasinghe  
1130 A, *et al.* Comprehensive Characterization of Cancer Driver Genes and  
1131 Mutations. *Cell* **2018**;174(4):1034-5
- 1132 63. Chang MT, Asthana S, Gao SP, Lee BH, Chapman JS, Kandath C, *et al.*  
1133 Identifying recurrent mutations in cancer reveals widespread lineage diversity  
1134 and mutational specificity. *Nature biotechnology* **2016**;34(2):155-63
- 1135 64. Bouaoun L, Sonkin D, Ardin M, Hollstein M, Byrnes G, Zavadil J, *et al.* TP53  
1136 Variations in Human Cancers: New Lessons from the IARC TP53 Database  
1137 and Genomics Data. *Human mutation* **2016**;37(9):865-76
- 1138 65. Giacomelli AO, Yang X, Lintner RE, McFarland JM, Duby M, Kim J, *et al.*  
1139 Mutational processes shape the landscape of TP53 mutations in human cancer.  
1140 *Nature genetics* **2018**;50(10):1381-7
- 1141 66. Willer CJ, Li Y, Abecasis GR. METAL: fast and efficient meta-analysis of  
1142 genomewide association scans. *Bioinformatics* **2010**;26(17):2190-1
- 1143 67. Chang CC, Chow CC, Tellier LC, Vattikuti S, Purcell SM, Lee JJ. Second-  
1144 generation PLINK: rising to the challenge of larger and richer datasets.  
1145 *Gigascience* **2015**;4:7
- 1146 68. Cancer Genome Atlas Research N, Weinstein JN, Collisson EA, Mills GB,  
1147 Shaw KR, Ozenberger BA, *et al.* The Cancer Genome Atlas Pan-Cancer  
1148 analysis project. *Nature genetics* **2013**;45(10):1113-20
- 1149 69. Korn JM, Kuruvilla FG, McCarroll SA, Wysoker A, Nemesh J, Cawley S, *et*  
1150 *al.* Integrated genotype calling and association analysis of SNPs, common  
1151 copy number polymorphisms and rare CNVs. *Nature genetics*  
1152 **2008**;40(10):1253-60
- 1153 70. Das S, Forer L, Schonherr S, Sidore C, Locke AE, Kwong A, *et al.* Next-  
1154 generation genotype imputation service and methods. *Nature genetics*  
1155 **2016**;48(10):1284-7
- 1156 71. Liu JF, Lichtenberg T, Hoadley KA, Poisson LM, Lazar AJ, Cherniack AD, *et*  
1157 *al.* An Integrated TCGA Pan-Cancer Clinical Data Resource to Drive High-  
1158 Quality Survival Outcome Analytics. *Cell* **2018**;173(2):400-+
- 1159 72. Bolger AM, Lohse M, Usadel B. Trimmomatic: a flexible trimmer for  
1160 Illumina sequence data. *Bioinformatics* **2014**;30(15):2114-20
- 1161 73. Li H, Durbin R. Fast and accurate short read alignment with Burrows-  
1162 Wheeler transform. *Bioinformatics* **2009**;25(14):1754-60
- 1163 74. Zhang Y, Liu T, Meyer CA, Eeckhoute J, Johnson DS, Bernstein BE, *et al.*  
1164 Model-based Analysis of ChIP-Seq (MACS). *Genome Biology*  
1165 **2008**;9(9):R137
- 1166 75. Ran FA, Hsu PD, Wright J, Agarwala V, Scott DA, Zhang F. Genome  
1167 engineering using the CRISPR-Cas9 system. *Nature protocols*  
1168 **2013**;8(11):2281-308
- 1169 76. Chou TC. Theoretical basis, experimental design, and computerized  
1170 simulation of synergism and antagonism in drug combination studies.  
1171 *Pharmacol Rev* **2006**;58(3):621-81

1172

1173

1174 **Figure Legends**

1175 **Figure 1. p53 regulatory cancer risk SNPs associate with subtype heterogeneity**  
1176 **risk.** (A) A proposed model of how p53 regulatory SNPs could modify the ability of  
1177 mutant p53 to drive cancer and of wild type (WT) p53 to suppress it. (B) Pie charts of  
1178 the percentages of oncogenic and loss-of-function p53 mutations found amongst all  
1179 known pathogenic p53 missense mutations in breast and ovarian cancers. (C) A bar  
1180 plot of the number of SNPs associated with subtype heterogeneity (adjusted  $P_{het} <$   
1181 0.05) across breast and ovarian cancer subtypes (shSNPs). The shSNPs are binned in  
1182 groups based on the allelic differences in risk found in the various subtypes. For  
1183 example, +-+ indicates an allele of the SNP associated with an increased risk for  
1184 ER+BC and LGSOC ( $OR > 1$ ), but lower risk in ER-BC and HGSOC ( $OR < 1$ ). Those  
1185 shSNPs with allelic differences in risk in the various subtypes that is consistent with  
1186 p53 mutation frequencies are highlighted in purple and labeled p53-shSNPs. (D) A  
1187 scatter plot of the fold enrichment of subtype heterogeneity eGenes amongst all  
1188 KEGG annotated signaling pathways relative to all eGenes in the genome. The x-axis  
1189 is in a log<sub>2</sub> scale, and the adjusted p-value on the y-axis is a -log<sub>10</sub> scale. The p53  
1190 pathway is in purple and the other 185 annotated KEGG pathways are in grey. The  
1191 horizontal dashed lines represent the FDR-adjusted p value of 0.05.

1192

1193 **Figure 2. p53 regulatory cancer risk SNPs associate with somatic *TP53***  
1194 **mutational status.** (A) Forest plots illustrating the associations of the three p53  
1195 regulatory SNPs with breast cancer (left) and ovarian cancer (right) subtype  
1196 heterogeneity. The odd ratios (OR) are plotted for each SNP and subtype and the error  
1197 bars represent the associated 95% confidence intervals (CI). (B) A schematic  
1198 overview of the association testing between the three p53 regulatory risk SNPs and  
1199 p53 mutational status in 4,625 tumors (TCGA). (C) Bar plots of the minor allele  
1200 frequencies (MAFs) of the three p53 regulatory SNPs in patients with either WT  
1201 TP53 tumors or mut TP53 tumors.

1202

1203 **Figure 3. A p53 regulatory cancer risk SNP can affect wild type and mutant p53**  
1204 **in tumors.** (A) A box plot of p53 mRNA expression levels on the y-axis (Log<sub>2</sub> scale)  
1205 in blood samples from 4,896 individuals with differing genotypes of the p53 poly(A)  
1206 SNP (x-axis): 4710 [A/A] homozygotes, 193 [A/C] heterozygotes and 2 [C/C]

1207 homozygotes. The central horizontal line indicates the median of each distribution,  
1208 upper and lower boundaries of the boxes indicate the 3rd and 1st quartiles. The p-  
1209 value (linear regression) and beta coefficients of the association of the genotype with  
1210 mRNA levels are depicted. (B) A box plot of p53 mRNA expression levels in 3,248  
1211 tumors from individuals with differing genotypes of the p53 poly(A) SNP (x-axis):  
1212 3160 [A/A] homozygotes, 87 [A/C] heterozygotes and 1 [C/C] homozygote. The p-  
1213 values and beta coefficients were determined using a linear model and are displayed  
1214 above the plots. (C) A pie chart of the percentages of different classes of pathogenic  
1215 p53 mutations in the 3,985 tumors of the TCGA cohort that had *TP53* sequence  
1216 information available. (D) Box plots of p53 mRNA expression levels in tumors from  
1217 individuals with differing genotypes of the p53 poly(A) SNP. The mRNA levels are  
1218 depicted for individuals with wild type *TP53* (left), missense *TP53* mutations (center)  
1219 and oncogenic *TP53* missense mutations (right). The p-values and beta coefficients  
1220 were determined using a linear model. (E) A schematic diagram of the p53 mutational  
1221 status and CRISPR/cas9-mediated genome editing strategy in Hap1 cells. The somatic  
1222 p53 mutation in the DNA binding domain, and the poly(A) SNP minor-allele C in 3'-  
1223 UTR, are highlighted in red. (F) A bar plot of p53 cDNA levels for each genotype in  
1224 Hap1 cells, measured using qRT-PCR normalized to GAPDH. Error bars represent  
1225 SEM of 3 independent experiments. p-values are depicted and were calculated using a  
1226 two-tailed t-test. (G) A bar plot of p53 protein levels for each genotype in Hap1 cells,  
1227 measured using densitometric analyses of results from Western blot analyses (upper  
1228 pane) and normalized to  $\beta$ -actin. Error bars represent SEM of 3 independent  
1229 experiments. p-values were calculated using a two-tailed t-test. (H) A schematic  
1230 overview of the qRT-PCR strategy to measure the levels of uncleaved p53 mRNA in  
1231 Hap1 cells of differing genotypes (upper). Two bar plots of uncleaved p53 mRNA  
1232 levels for each genotype in Hap1 cells, measured using qRT-PCR normalized to  
1233 GAPDH (lower). Two sets of primers (P1-F/R and P2-F/R) were used to amplify the  
1234 p53 pre-mRNAs. (I) The results of 3' RNA sequencing of logarithmically growing  
1235 cells from multiple clones and replicates of cells with the p53 poly(A) SNP C-alleles  
1236 (red and orange tracks) and with multiple replicates of the A-allele clone (grey bars).  
1237 The track abundance is plotted for each replicate for the RNAs found at the 3' end of  
1238 the *TP53* gene and a diagram of the gene is found above the plots for reference. A  
1239 vertical dotted line and horizontal arrow indicates the uncleaved p53 RNAs. (J) Venn  
1240 diagrams of the down-regulated (left) and the up-regulated (right) genes identified in

1241 the C-allele-containing clones (#1, right; #2, left) relative to the A-allele-containing  
1242 clone. (K) A scatterplot showing the Pearson's correlation between the log<sub>2</sub> fold  
1243 change values of the common significantly differentially expressed genes identified in  
1244 two edited clones with the C-allele compared to the clone with the A-allele (adjusted  
1245 p values < 0.05, fold change >1.5). (L) A bar plot of the -log<sub>10</sub> p-values for the top 10  
1246 enriched pathways amongst the commonly down-regulated 104 genes. The pathways  
1247 with FDR-adjusted p-values less than 0.05 are indicated in orange. The transcripts in  
1248 each pathway that were enriched are noted.

1249

1250 **Figure 4. A p53 regulatory cancer risk SNP associates with patient outcome in a**  
1251 **manner that depends on somatic p53 mutational status.** (A) A forest plot of the  
1252 progression free intervals (PFI) and overall survival rates (OS) of 7,012 cancer  
1253 patients (pan-cancer TCGA cohort) stratified by the somatic p53 mutational status:  
1254 wild type, copy number loss (CNV-loss), and p53 mutation. Number of patients in  
1255 each group are indicated on the left, and the hazard ratios (HR) comparing PFI and  
1256 OS in patients with or without mutations are indicated on the right. HR and logrank p  
1257 values are also displayed and were calculated using Cox proportional hazards model.  
1258 The error bars represent 95% confidence intervals. (B–C) Kaplan-Meier survival  
1259 curves for PFI (B) and OS (C) in a total of 4,625 cancer patients carrying either the  
1260 major or the minor allele of the p53 poly(A) SNP and/or somatic *TP53* mutations.  
1261 Curves were truncated at 10 years, but the statistical analyses were performed using  
1262 all of the data (logrank test). Below each plot, the number of patients for each time  
1263 point, and genotype class, are indicated. (D) Kaplan-Meier survival curves for PFI in  
1264 a total of 381 breast cancer patients carrying either the major or the minor allele of the  
1265 p53 poly(A) SNP and/or somatic *TP53* mutations.

1266

1267 **Figure 5. p53 pathway genes with cancer risk SNPs associate with cellular**  
1268 **chemosensitivities to p53 activation.** (A) A Chord Diagram of 102 cancer GWAS  
1269 lead SNPs in 41 p53 pathway genes (upper) that associate differential risk to a total of  
1270 19 different cancer types (lower). The width of the connecting band indicates the  
1271 number of lead SNPs for each association. A dot plot of the odds ratios for each  
1272 association is presented in the inner circle and with red dots. The median odd ratio for  
1273 each association is presented in parentheses next to the gene name. The two genes,

1274 *TP53* and *KITLG* with the highest odds ratios are boxed in red. (B) A volcano plot of  
1275 304 drugs and their association with differential sensitivity in 311 cancer cell lines  
1276 carrying WT *TP53* relative to 365 cell lines with *TP53* somatic alterations.  $-\text{Log}_{10}$   
1277 adjusted p-values (linear regression and FDR-adjusted) are plotted against the  $\text{Log}_2$   
1278 fold change of the average IC50 concentrations (*TP53* WT vs. mutant and CNV loss).  
1279 The horizontal dashed lines represent the FDR-adjusted p value of 0.05. The 117  
1280 drugs significantly associated with differential sensitivity are labeled in orange. (C-D)  
1281 Box plots of the  $\text{Log}_2$  average IC50 values of Nutlin3 in cells either with low,  
1282 medium or high MDM2 mRNA levels and wild type (C) or mutant (D) *TP53*. The  
1283 number of cell lines analyzed in each group is indicated below the relevant plot. The  
1284 p-values were determined using a linear model and are displayed above the plots. (E)  
1285 A bar graph of the percentage of the p53 pathway genes with cancer GWAS loci that  
1286 also associate with Nutlin3 sensitivity compared with the p53 pathway genes without  
1287 cancer GWAS risk loci. (F) Two volcano plots of the level of the associations  
1288 between the transcript levels of the 410 *TP53* pathway genes and Nutlin3 sensitivities  
1289 in cancer cell lines with either WT (upper) or mutant (lower) *TP53*. The  $-\text{Log}_{10}$   
1290 adjusted p-value for each association is plotted against the beta coefficient. The  
1291 horizontal dashed lines represent the FDR-adjusted p value of 0.05. (G-H) Box plots  
1292 of the  $\text{Log}_2$  average IC50 values of Nutlin3 in cells either with low, medium or high  
1293 mRNA (G: *TP53*; H: *KITLG*) levels and wild type *TP53* (left panel in blue) or mutant  
1294 *TP53* (left panel in red). The p-values were determined using a linear model as  
1295 described above.

1296

1297 **Figure 6. The p53-bound cancer risk SNPs in *KITLG* associate with patient**  
1298 **outcome and *KITLG* expression.** (A) Genetic fine mapping identified 6 SNPs with  
1299 the strongest TGCT GWAS signal (high  $-\text{Log}_{10}$  p-values) and which are in high  
1300 linkage disequilibrium in Europeans ( $r^2 > 0.95$ ; red square). The color scale in the right  
1301 panel indicates the linkage disequilibrium ( $r^2$ ) at this locus. (B) A highly p53-  
1302 occupied risk locus contains four SNPs reside in predicted p53-REs (red boxes). (C-  
1303 D) Kaplan-Meier survival curves for PFI in high-stage (C: 68 patients) or low-stage  
1304 TGCT patients (D: 49 patient) carrying either the risk (in grey) or non-risk allele (in  
1305 red) of the *KITLG* SNP. p value was calculated using log-rank test. (E-F) *KITLG*  
1306 gene expression (in TCGT cell lines TERA1 and TERA2, as measured in non-edited

1307 clones (p53-REs<sup>+/+</sup>), heterozygous knock-out clones (p53REs<sup>+/-</sup>) and homozygous  
1308 knock-out clones (p53-REs<sup>-/-</sup>) using qRT-PCR normalized to GAPDH. In total, 2 to 3  
1309 clones of each genotype were analyzed in 3 independent biological replicates. Black  
1310 lines indicate the mean expression; *n*, the number of clones per genotype. p-values  
1311 were calculated using a one-way ANOVA, followed by Tukey's multiple comparison  
1312 test. (G) A bar graph of the fold change in *KITLG* cDNA levels after Nutlin3  
1313 treatment, measured using qRT-PCR normalized to GAPDH and a DMSO control.  
1314 Error bars represent SEM of 2 clones for each genotype and in 2 independent  
1315 experiments. p-values were calculated using a two-tailed t-test. (H) Dot plots of  
1316 *KITLG* cDNA levels that were measured using qRT-PCR and normalized to GAPDH.  
1317 Each dot represents the mean of 3 technical replicates for a given biological replicate.  
1318

1319 **Figure 7. p53/*KITLG* pro-survival signaling can attenuate responses to p53-**  
1320 **activating agents.** (A) Bar blots of the IC<sub>50</sub> values for Nutlin3 of TERA1 and TERA  
1321 2 cells. p-values were calculated using a two-tailed t-test and error bars represent  
1322 SEM in at least 3 independent biological replicates. (B) Bar plots depicting the  
1323 number of hits and “non-hits” for each of the 14 drug classes examined. (C) Scatter  
1324 plots of the fold enrichment of hits on the x-axis (log<sub>2</sub> scale), and the adjusted p-value  
1325 on the y-axis (-log<sub>10</sub> scale), amongst each drug class relative to the total compounds in  
1326 14 drug classes. The horizontal dashed lines represent the FDR-adjusted p value of  
1327 0.05. (D) Bar plots of average IC<sub>50</sub> values for 3 TOPO inhibitors in p53-REs<sup>+/+</sup>  
1328 (grey bars, two clones), p53-REs<sup>-/-</sup> (red bars, two clones) p53-REs<sup>-/-</sup>/KI (orange bars,  
1329 one clone) of TERA1 cells. Error bars represent SEM of at least two independent  
1330 biological replicates. (E) Bar plots of combination indexes of Dasatinib with Nutlin3  
1331 or Doxorubicin in p53-REs<sup>+/+</sup> (grey bars, two clones), p53-REs<sup>-/-</sup> (red bars, two  
1332 clones) and knock-in clones (orange bars, one clone) of TERA1 and TERA2 cells. (F)  
1333 Bar plots of combination indexes of Dasatinib with Nutlin3 or Doxorubicin in panel  
1334 of TGCT cell lines. (G) Growth curves of 2102EP xenograft tumors treated with  
1335 vehicle, Doxorubicin, Dasatinib or the combination of Doxorubicin and Dasatinib.  
1336 Error bars represent means ± SEM (n=6). (H) A diagram depicting the development  
1337 of more effective therapy combinations by modulating both the cell death and  
1338 survival functions of p53 based on both the inherited and somatic genetics of the  
1339 patient.



# Figure 1

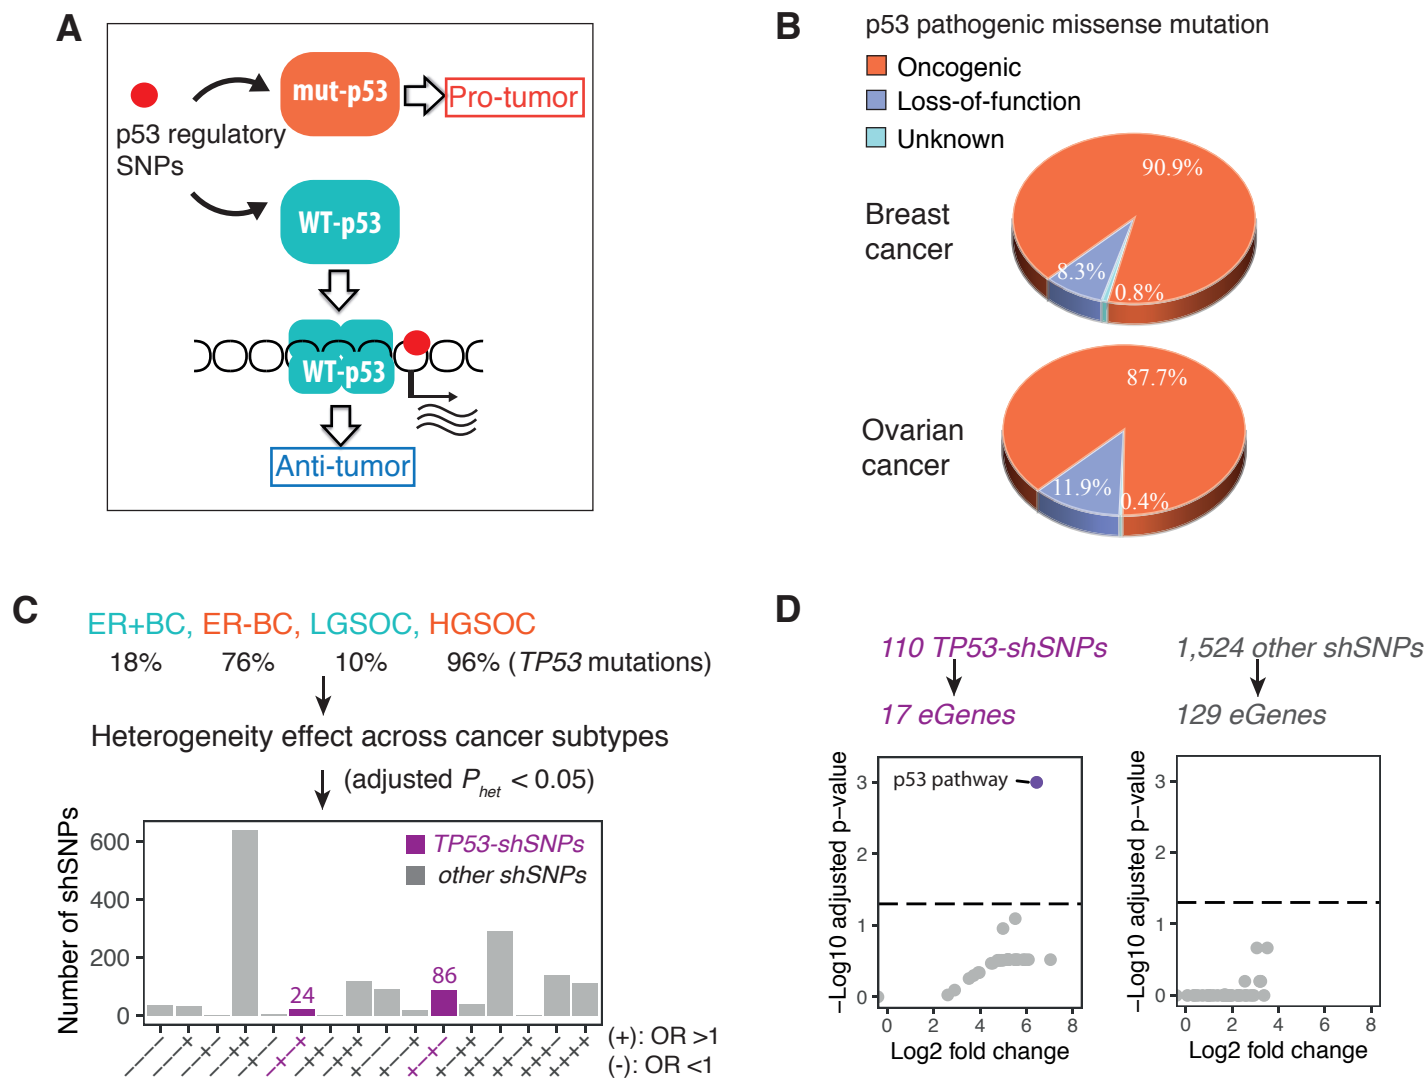

## Figure 2

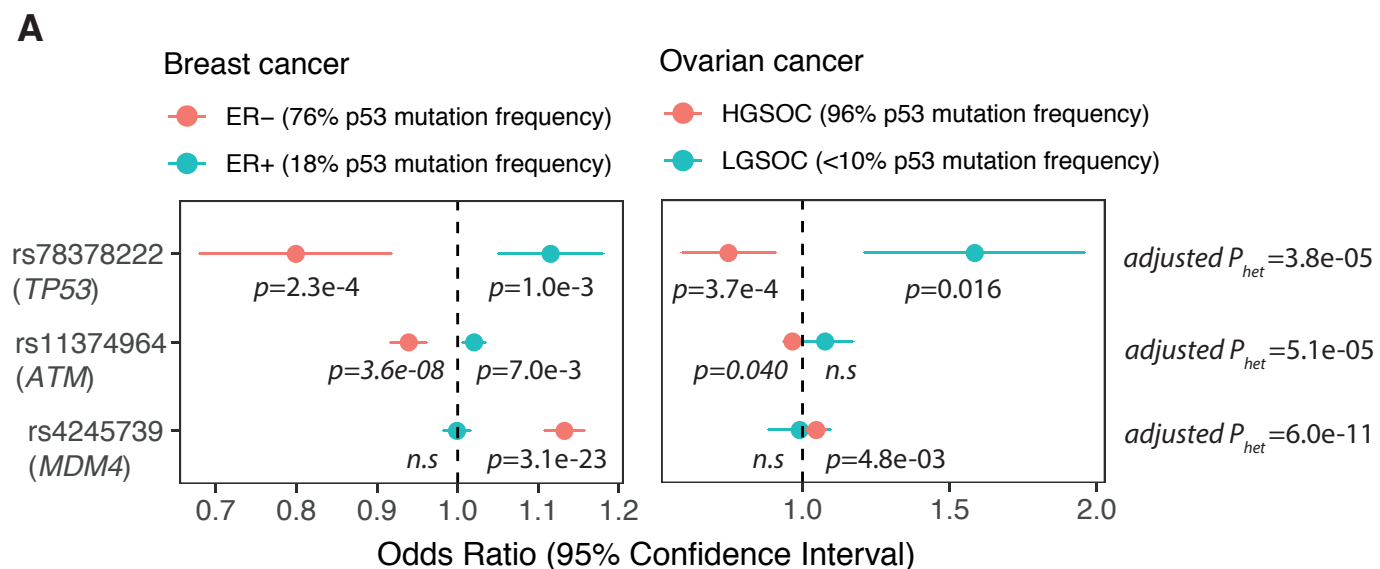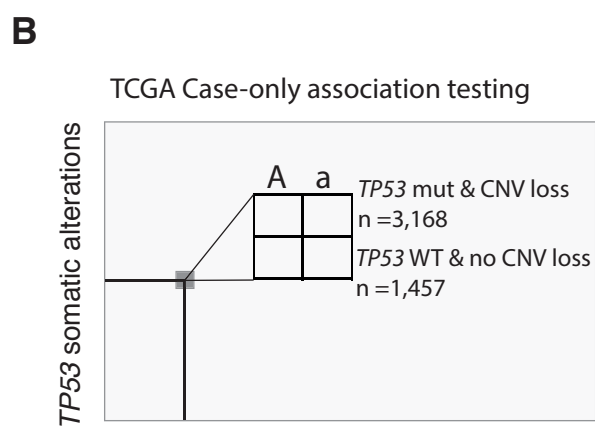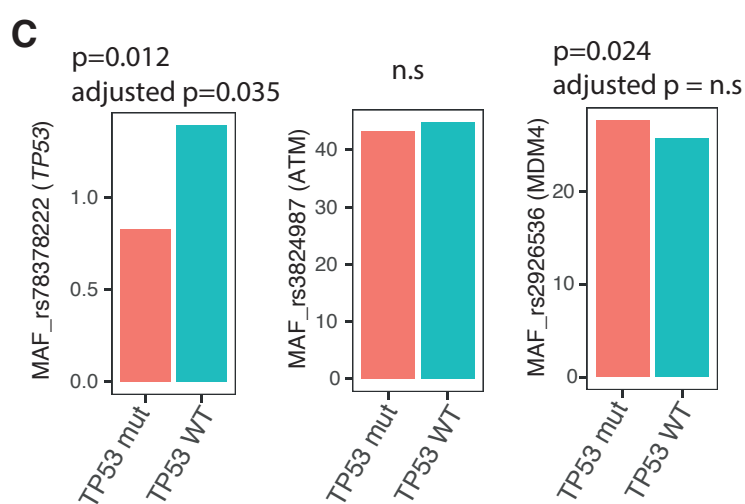

## Figure 3

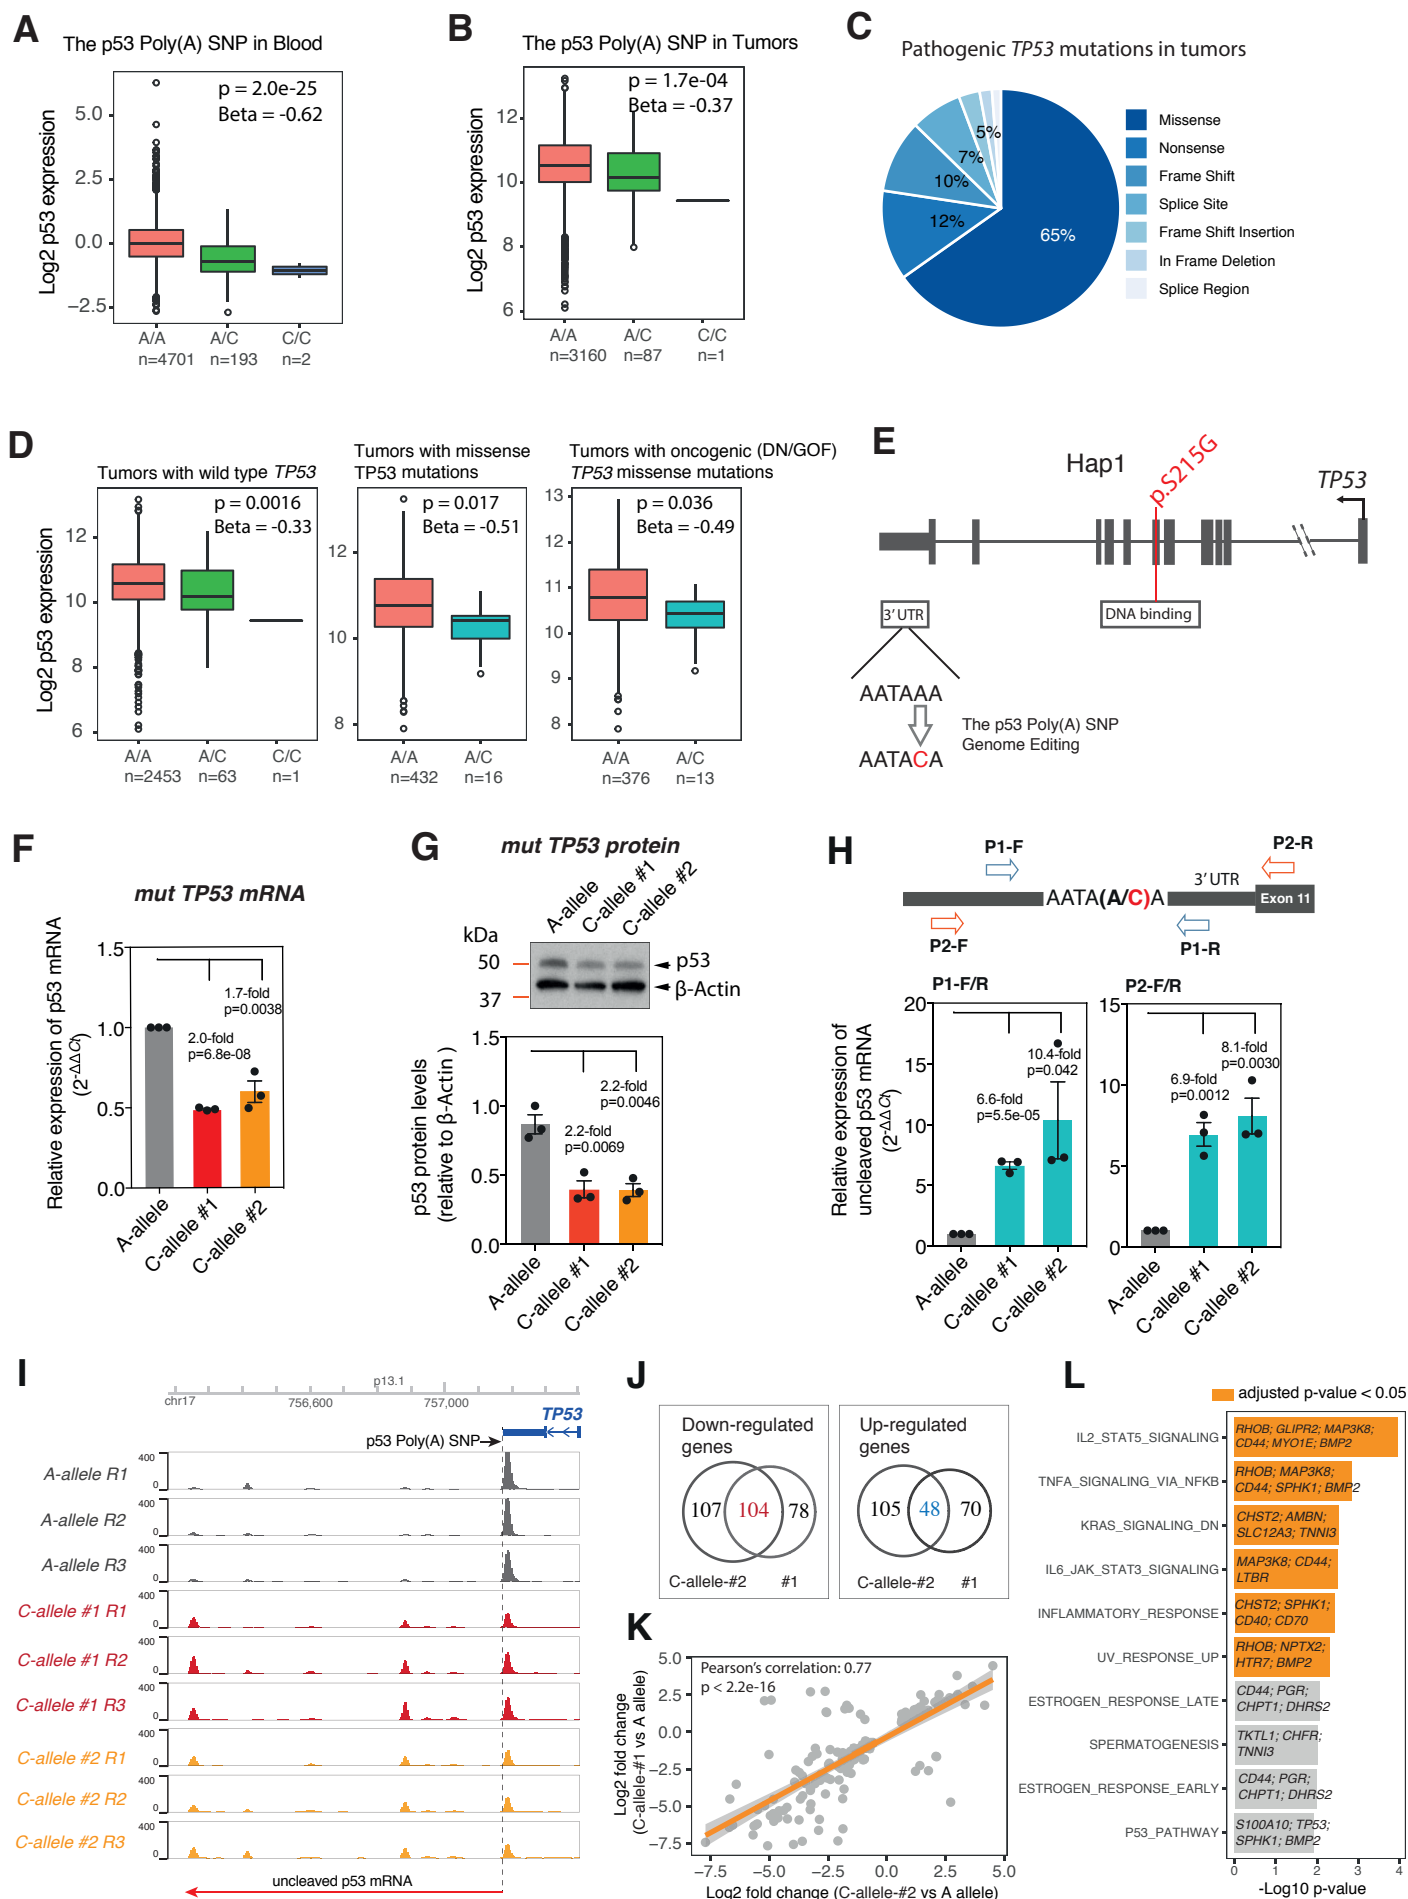

**A**

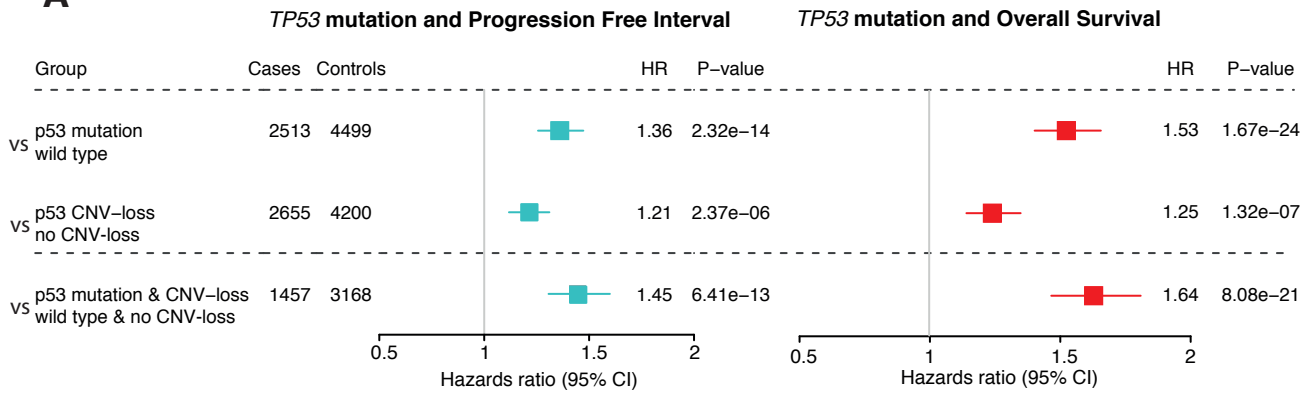

**B**

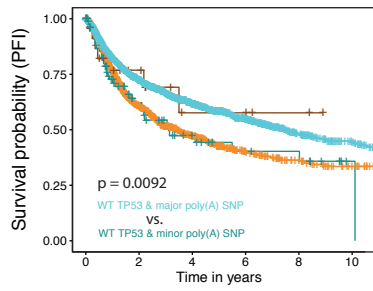

| Number at risk               | 0    | 2    | 4   | 6   | 8   | 10 |
|------------------------------|------|------|-----|-----|-----|----|
| Mut TP53 & major poly(A) SNP | 1429 | 509  | 219 | 101 | 56  | 28 |
| Mut TP53 & minor poly(A) SNP | 24   | 11   | 4   | 2   | 0   | 0  |
| WT TP53 & major poly(A) SNP  | 3058 | 1402 | 655 | 327 | 153 | 86 |
| WT TP53 & minor poly(A) SNP  | 36   | 3    | 1   | 0   | 0   | 0  |

**C**

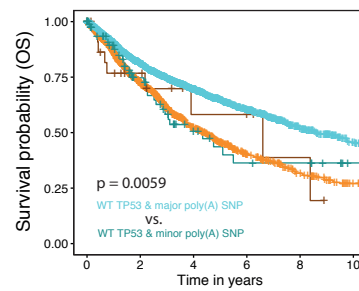

| Number at risk               | 0    | 2    | 4   | 6   | 8   | 10  |
|------------------------------|------|------|-----|-----|-----|-----|
| Mut TP53 & major poly(A) SNP | 1429 | 677  | 300 | 142 | 78  | 37  |
| Mut TP53 & minor poly(A) SNP | 24   | 12   | 5   | 2   | 0   | 0   |
| WT TP53 & major poly(A) SNP  | 3061 | 1644 | 816 | 422 | 208 | 115 |
| WT TP53 & minor poly(A) SNP  | 36   | 3    | 1   | 0   | 0   | 0   |

**D**

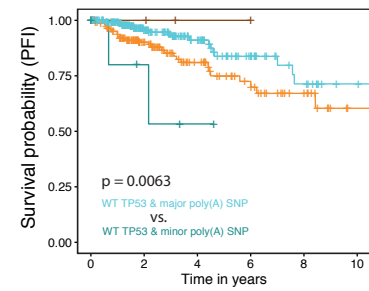

| Number at risk               | 0   | 2   | 4  | 6  | 8  | 10 |
|------------------------------|-----|-----|----|----|----|----|
| Mut TP53 & major poly(A) SNP | 151 | 84  | 47 | 28 | 15 | 3  |
| Mut TP53 & minor poly(A) SNP | 5   | 3   | 1  | 0  | 0  | 0  |
| WT TP53 & major poly(A) SNP  | 219 | 111 | 62 | 32 | 17 | 8  |
| WT TP53 & minor poly(A) SNP  | 36  | 3   | 1  | 0  | 0  | 0  |

## Figure 5

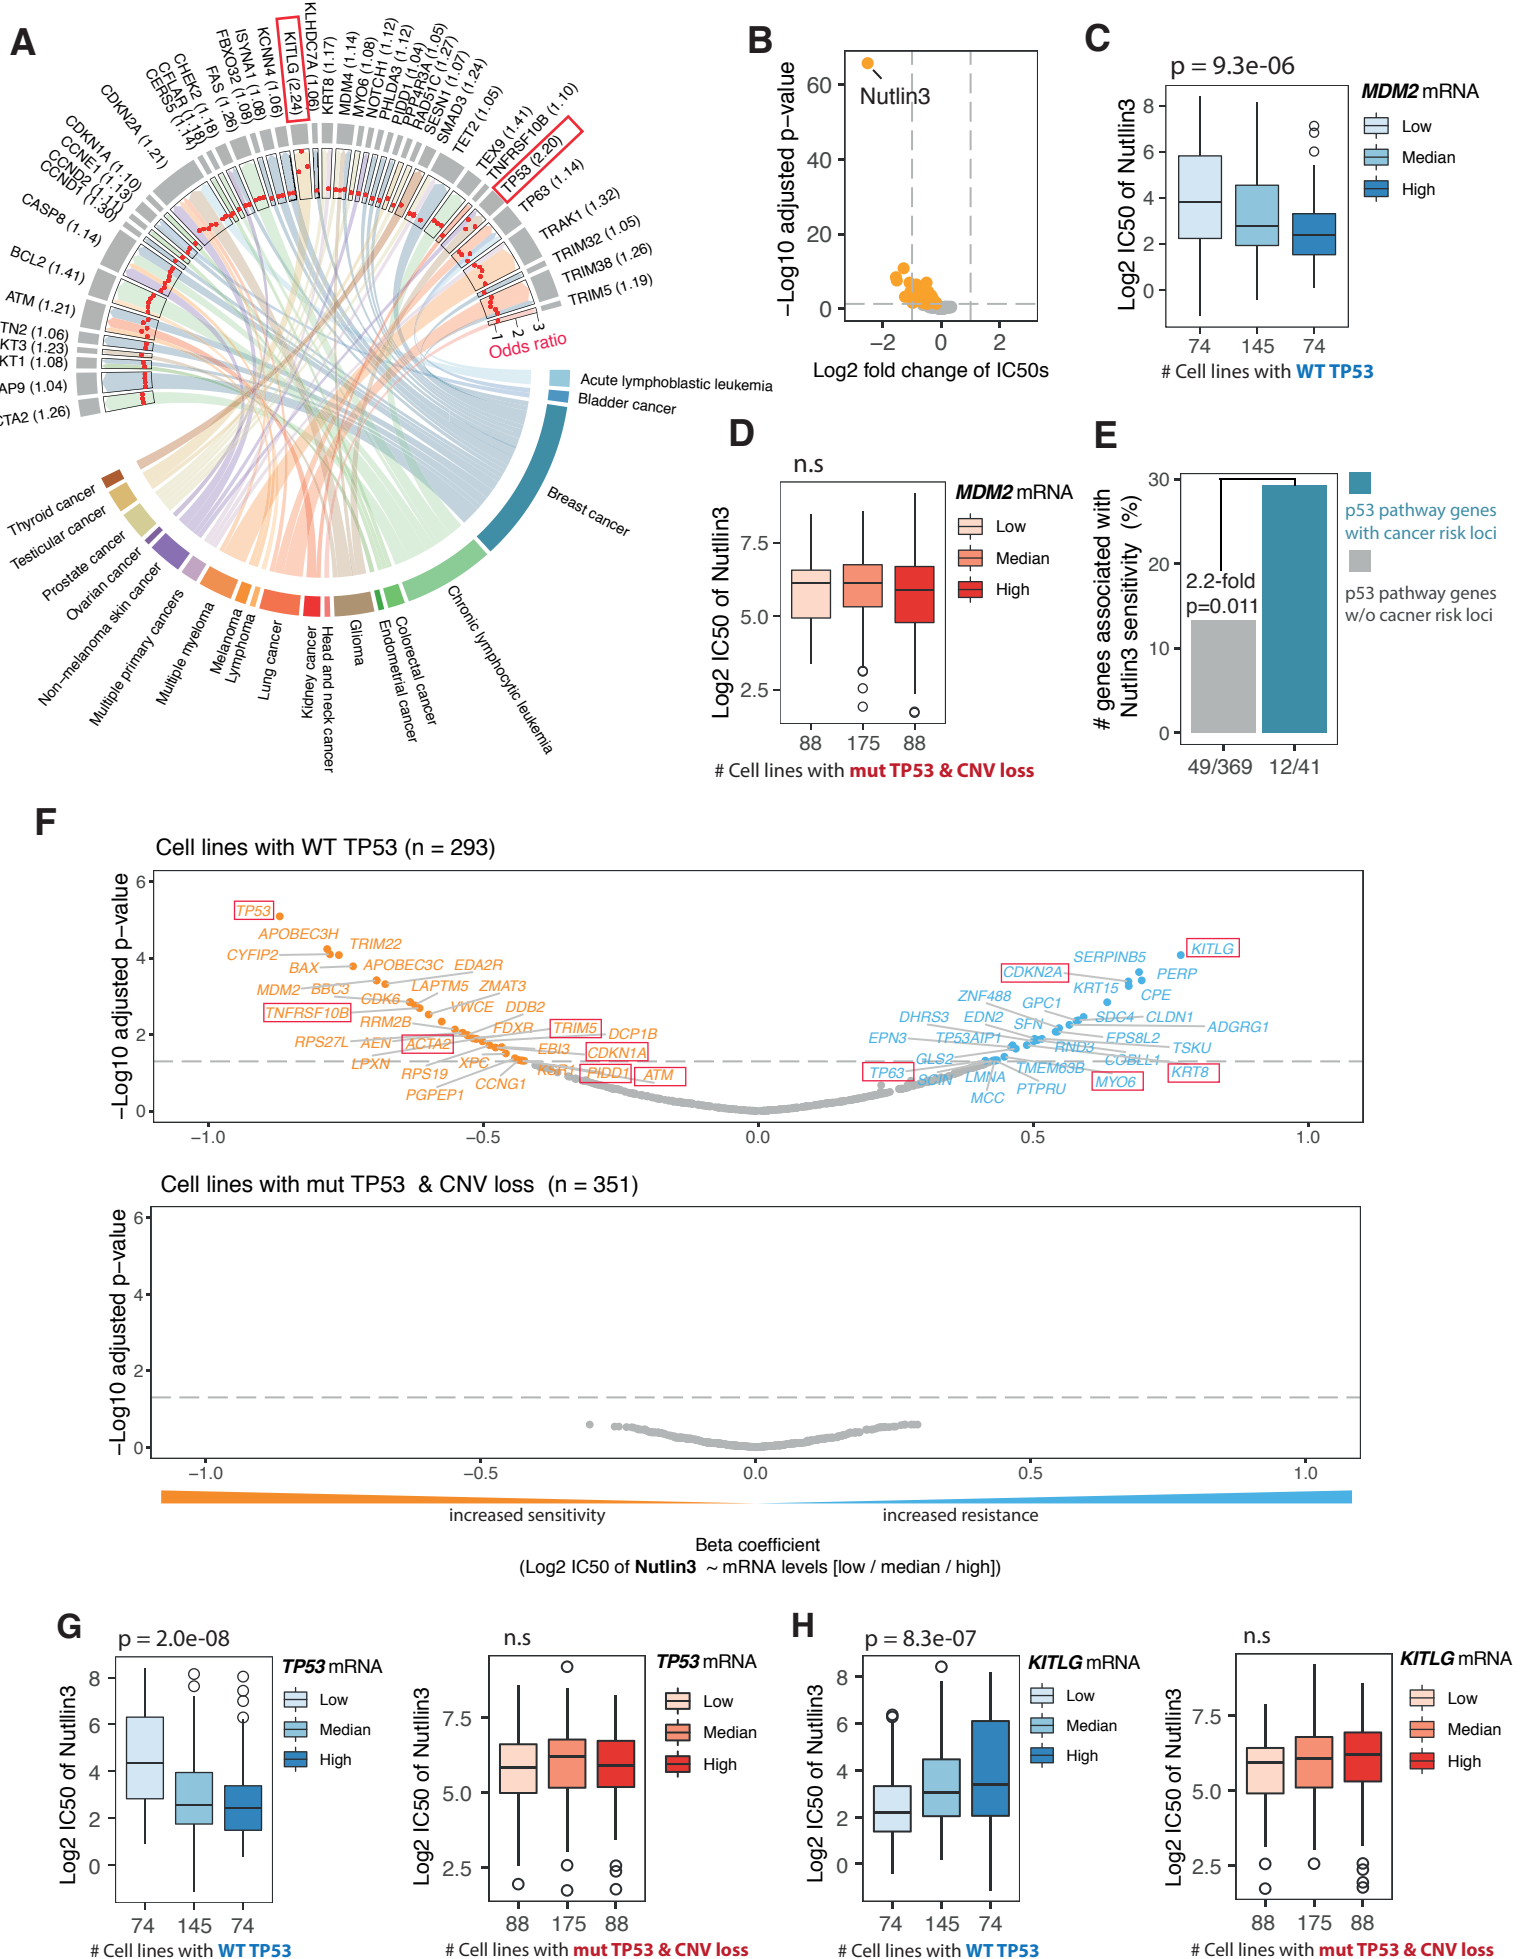

# Figure 6

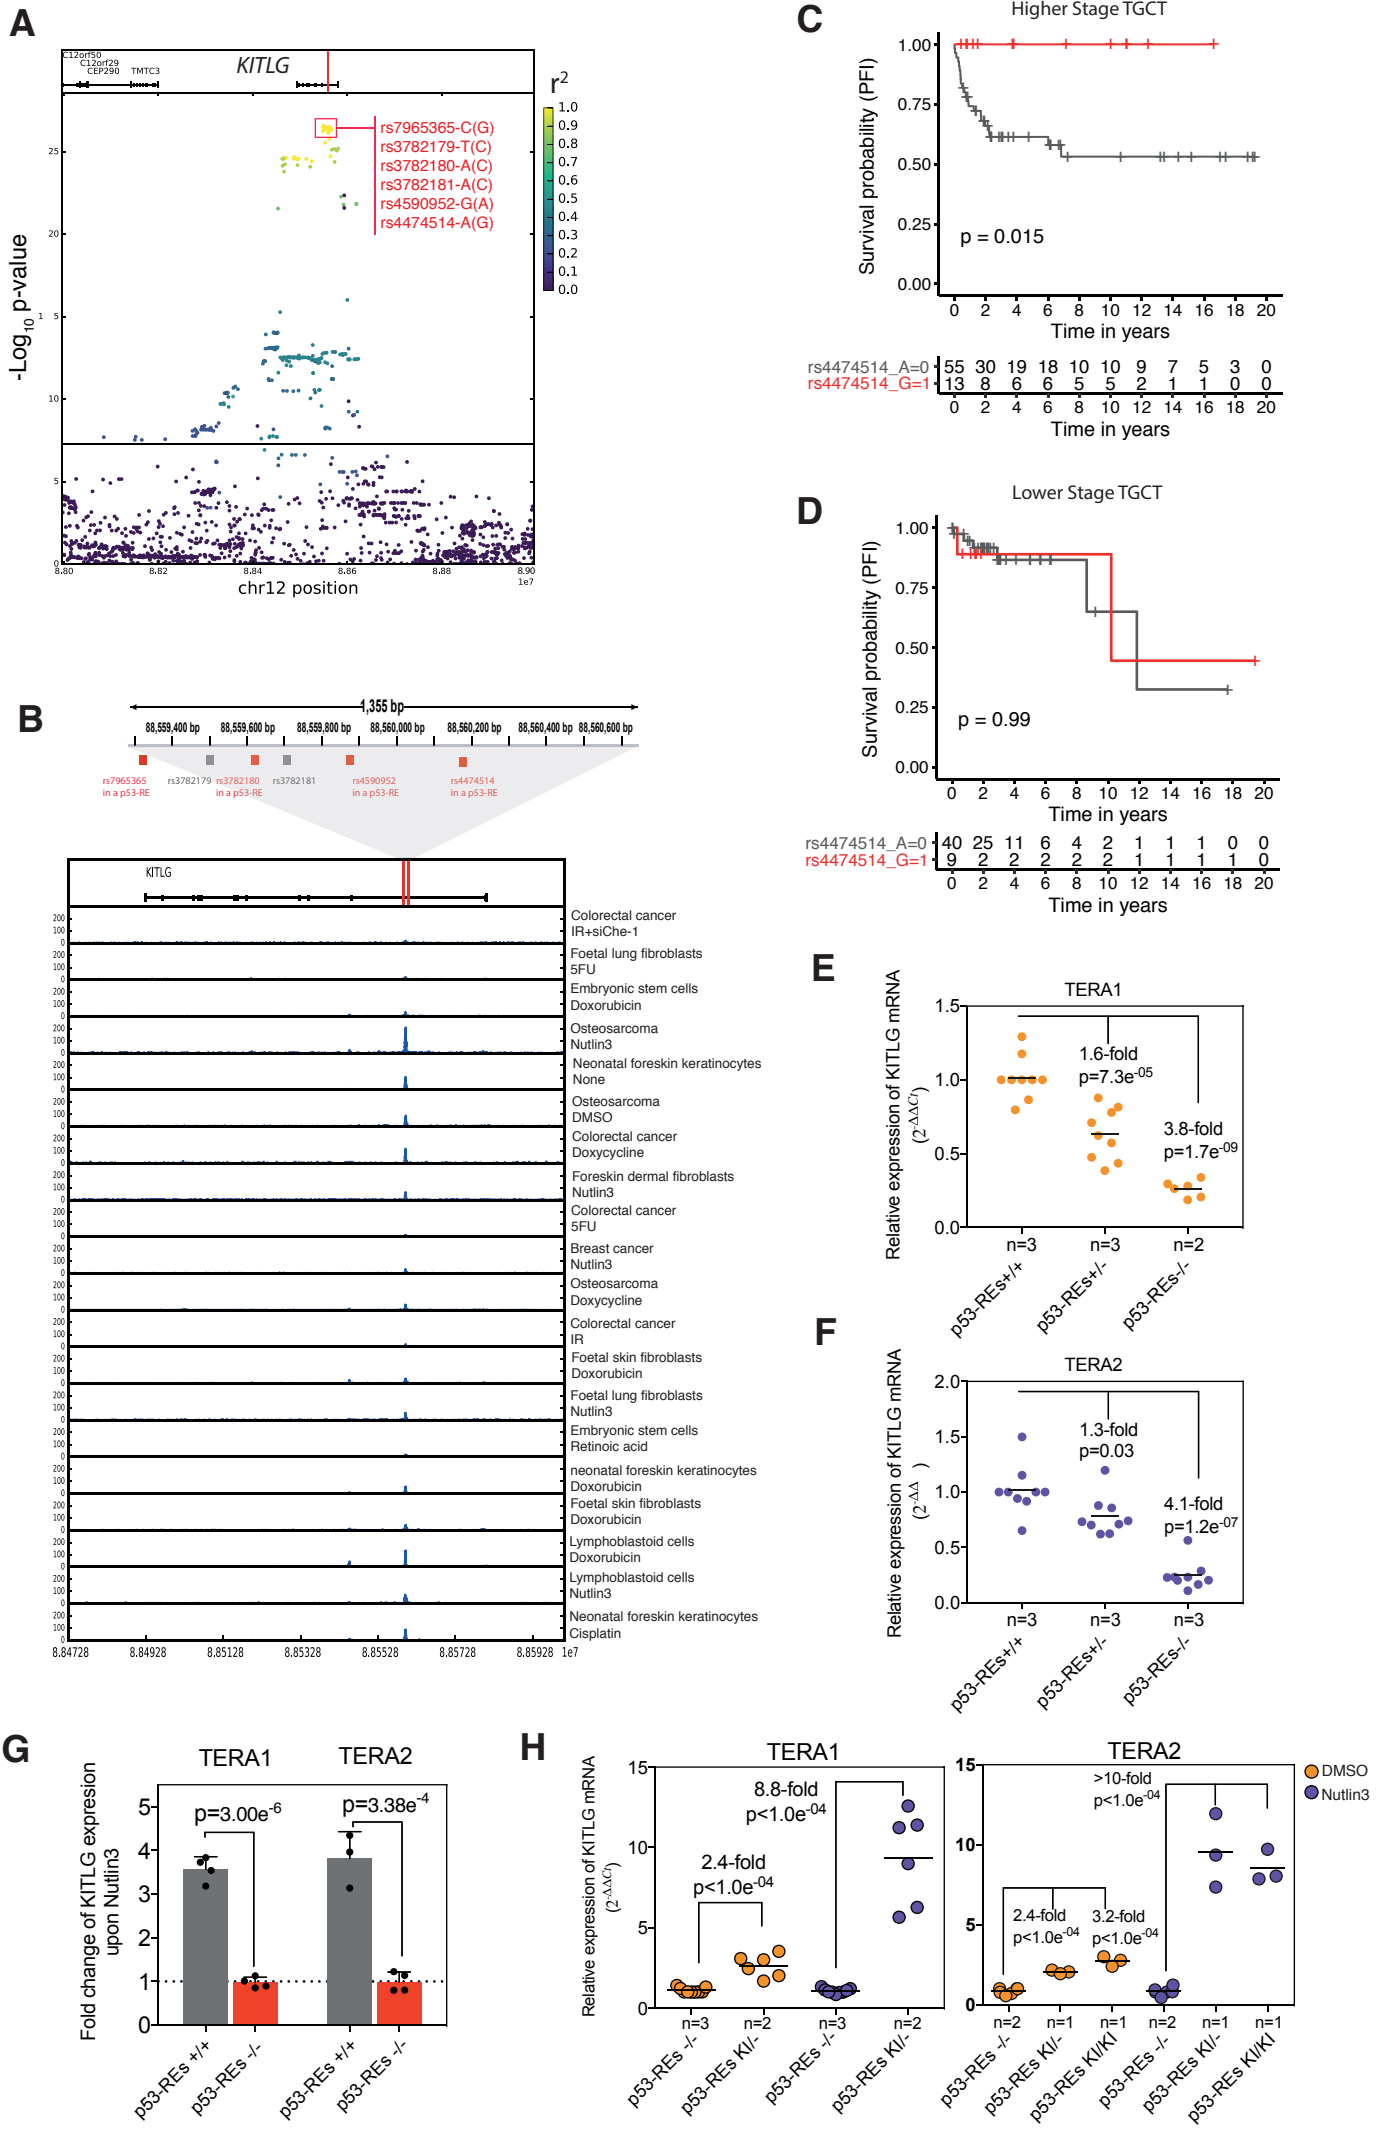

## Figure 7

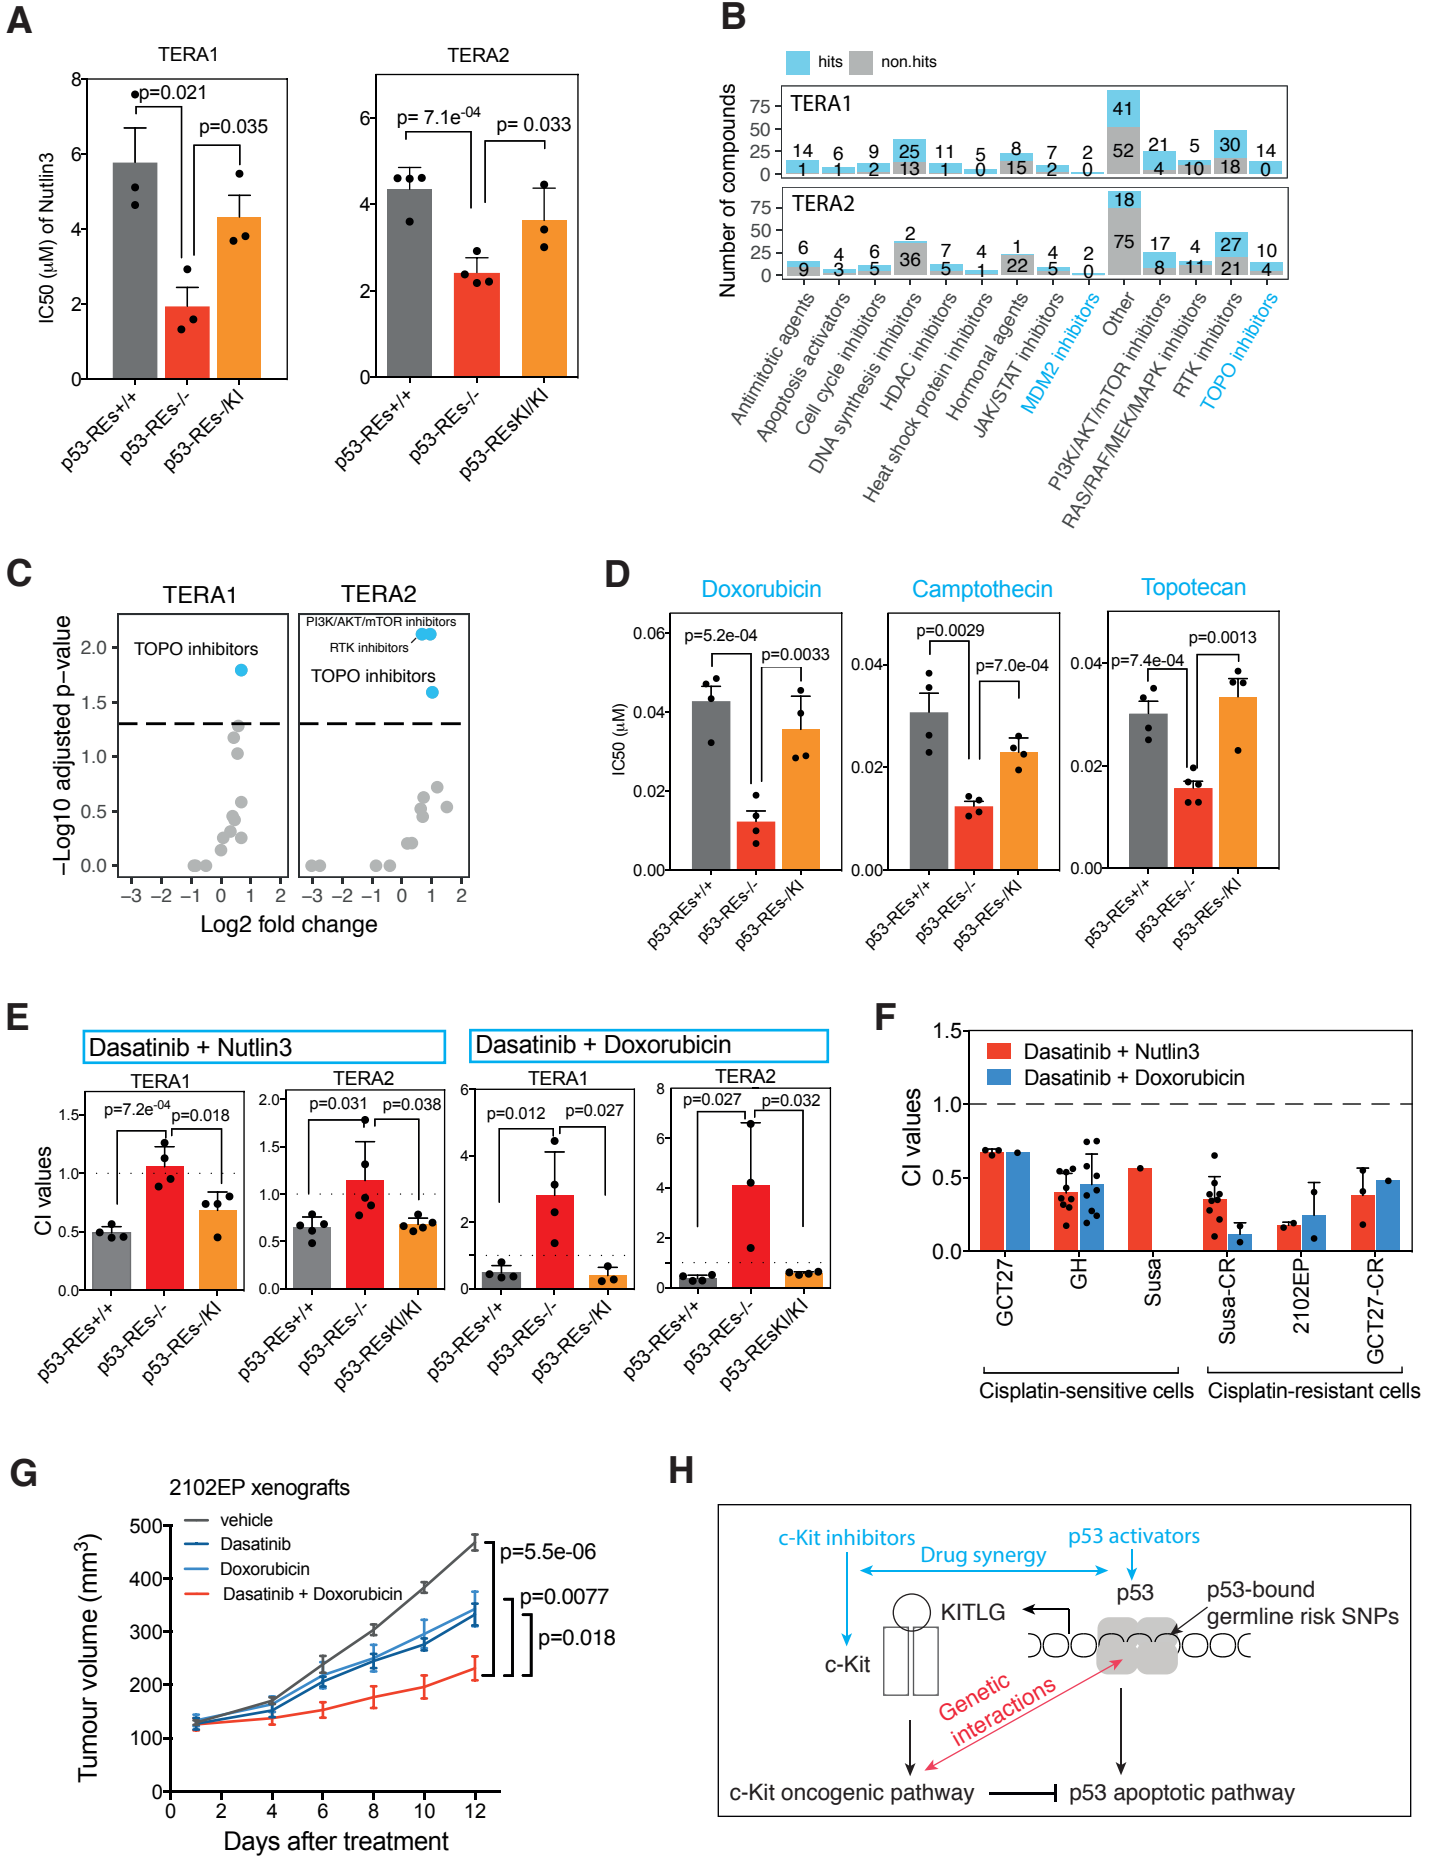

Source: https://www.biorxiv.org/content/biorxiv/early/2019/11/09/835918.full.pdf
